# Supplementary material for: High-resolution vertical biogeochemical profiles in the hyporheic zone reveal insights into microbial methane cycling
Source: Copernicus journal article supplement (doi:10.5194/egusphere-2022-373), 2022-05-30
Supplement: Supplementary file [file egusphere-2022-373-AC3-supplement.pdf]

## Correction of our answer to the comments of Anonymous Referee #2

In an internal revision process we discovered a unit conversion error in the spreadsheet used to calculate CH<sub>4</sub> saturation concentrations in the sediment. To correct this mistake, we updated the table that was shown earlier in the answer to Referee #2:

| Profil | T    | Water depth (m) | Atmospheric pressure on sampling day (kPa) | Saturation conc. at the sediment-water interface (μmol/l) | Saturation conc. in 30 cm sediment depth (μmol/l) |
|--------|------|-----------------|--------------------------------------------|-----------------------------------------------------------|---------------------------------------------------|
| A      | 7.5  | 0.7             | 102.2                                      | 2408                                                      | 2473                                              |
| B      | 12   | 1.1             | 101.7                                      | 2319                                                      | 2380                                              |
| C      | 16.6 | 0.6             | 101.1                                      | 2066                                                      | 2122                                              |
| D      | 17.1 | 1.2             | 95.4                                       | 2055                                                      | 2111                                              |
| E      | 15.8 | 0.7             | 101.8                                      | 2243                                                      | 2304                                              |

The respective paragraph in the paper was changed to:

“Pore-water CH<sub>4</sub> concentrations did not exceed CH<sub>4</sub> saturation concentrations of more than 2 mmol L<sup>-1</sup> (calculated using PhreeqC (Parkhurst & Appelo, 2013) for the mean surface water temperature during the sampling periods and respective water depths at each site) with only one exception. In profile C, a CH<sub>4</sub> concentration of 19.8 mmol L<sup>-1</sup> was measured in 27 cm depth (not displayed in Fig. 3 since it is far out of the axes’ range) which exceeds the saturation concentration by far and implies direct contact with a gas bubble. In addition, it must be mentioned that bubble formation is also possible at lower CH<sub>4</sub> partial pressures if microstructures are present or if CH<sub>4</sub> production occurs in small-scale local hotspots.“
