# Supplementary material for: High-resolution vertical biogeochemical profiles in the hyporheic zone reveal insights into microbial methane cycling
Source: Copernicus journal article supplement (doi:10.5194/egusphere-2022-373), 2022-05-30
Supplement: Supplementary file [file egusphere-2022-373-RC1-supplement.pdf]

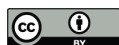

# High-resolution vertical biogeochemical profiles in the hyporheic zone reveal insights into microbial methane cycling

Tamara Michaelis<sup>1</sup>, Anja Wunderlich<sup>1</sup>, Ömer K. Coskun<sup>2</sup>, William Orsi<sup>2,3</sup>, Thomas Baumann<sup>1</sup>, Florian Einsiedl<sup>1</sup>

5 <sup>1</sup> Chair of Hydrogeology, School of Engineering and Design, Technical University Munich, Munich, Germany

<sup>2</sup> Department of Earth and Environmental Sciences, Paleontology & Geobiology, Ludwig-Maximilians-Universität München, 80333 Munich, Germany.

<sup>3</sup> GeoBio-Center<sup>LMU</sup>, Ludwig-Maximilians-Universität München, 80333 Munich, Germany

Correspondence to: Florian Einsiedl (f.einsiedl@tum.de)

10 **Abstract.** Facing the challenges of climate change, policy making relies on sound greenhouse gas (GHG) budgets. Rivers and streams emit large quantities of the potent GHG methane (CH<sub>4</sub>), but their global impact on atmospheric CH<sub>4</sub> concentrations is highly uncertain. In-situ data from the hyporheic zone (HZ), where most CH<sub>4</sub> is produced and some of it can be oxidized to CO<sub>2</sub>, are lacking for an accurate description of CH<sub>4</sub> production and consumption in streams. To address this, we recorded high-resolution depth-resolved geochemical profiles at five different locations in the stream bed of river Moosach, Southern  
15 Germany. Specifically, we measured pore-water concentrations and stable carbon isotopes ( $\delta^{13}\text{C}$ ) of dissolved CH<sub>4</sub> as well as relevant electron acceptors for oxidation with a 1 cm vertical depth-resolution. Findings were interpreted with the help of a numerical model, and 16S rRNA gene analyses added information on the microbial community at one of the locations. Our data confirms with pore-water CH<sub>4</sub> concentrations of up to 1000  $\mu\text{mol L}^{-1}$  that large quantities of CH<sub>4</sub> are produced in the HZ. Stable isotope measurements of CH<sub>4</sub> suggest that hydrogenotrophic methanogenesis represents a dominant pathway for CH<sub>4</sub>  
20 production in the HZ of river Moosach, while a relatively high abundance of a novel group of methanogenic archaea, the Methanomethyliales (Phylum Verstraetearchaeota), indicate that CH<sub>4</sub> production through H<sub>2</sub> dependent methylotrophic methanogenesis might also be an important CH<sub>4</sub> source. Combined isotopic and modeling results clearly implied CH<sub>4</sub> oxidation processes at one of the sampled locations, but due to the steep chemical gradients and the close proximity of the oxygen and nitrate reduction zones no single electron acceptor for this process could be identified. Nevertheless, the numerical modeling  
25 results showed not only a potential for aerobic CH<sub>4</sub> oxidation, but also for anaerobic oxidation of CH<sub>4</sub> coupled to denitrification. In addition, the nitrate-methane transition zone was characterized by an increased relative abundance of microbial groups (*Crenothrix*, NC10) known to mediate nitrate and nitrite dependent methane oxidation in the hyporheic zone.

## 1 Introduction

30 At the UN Climate Change conference 2021 (COP26) in Glasgow over 100 countries signed the Global Methane Pledge, an agreement to reduce CH<sub>4</sub> emissions by 30 % until 2030 compared to 2020 levels (European Commission and United States of



America, 2021). CH<sub>4</sub> has been estimated to account for 20 % of the Earth's warming (Kirschke et al., 2013) and atmospheric methane concentrations have increased with a significant acceleration in recent years (Nisbet et al., 2014; 2019). The largest source of uncertainty in global CH<sub>4</sub> budgets are natural emissions (Saunio et al., 2020). Although rivers and streams represent only a small fraction of surface waters, they contribute considerable amounts of CH<sub>4</sub> to atmospheric concentrations (Campeau and Del Giorgio, 2014; Borges et al., 2015; Bange et al., 2019). Based on the evaluation of 385 globally distributed sites, rivers and streams are expected to emit 27 Tg CH<sub>4</sub> y<sup>-1</sup> (Stanley et al., 2016) which is equal to 7.  10<sup>8</sup> t CO<sub>2</sub> equivalents (IPCC, 2013).

In rivers and streams CH<sub>4</sub> production is a microbially driven process concentrated in anaerobic sediments of the hyporheic zone (HZ) (Trimmer et al., 2012). The HZ represents a spatially and temporarily dynamic saturated subsurface layer where stream water enters a river's bed and banks and is a zone known for high biogeochemical activity (Findlay, 1995; Winter et al., 1998). Hyporheic exchange delivers electron acceptors such as oxygen (O<sub>2</sub>), nitrate (NO<sub>3</sub><sup>-</sup>), sulfate (SO<sub>4</sub><sup>2-</sup>), as well as nutrients and organic carbon (OC) to the HZ where microbially mediated transformation reactions take place (Boano et al., 2014). After dissolved O<sub>2</sub> is consumed, other terminal electron acceptors become dominant in consecutive zones of denitrification, manganese (Mn)-, iron (Fe)- and SO<sub>4</sub><sup>2-</sup> reduction and finally, CH<sub>4</sub> production (methanogenesis) (Canfield and Thamdrup, 2009).

CH<sub>4</sub> is produced by methanogens, strictly anaerobic archaea that thrive where the environment is deprived of light, NO<sub>3</sub><sup>-</sup> and SO<sub>4</sub><sup>2-</sup> (Deppenmeier, 2002; Offre et al., 2013). Two metabolic pathways dominate CH<sub>4</sub> production in natural environments, hydrogenotrophic and acetoclastic methanogenesis (Conrad, 2005). Measurements of stable carbon-isotopes of CH<sub>4</sub> can be used as an indicator for the relative contribution of the different methanogenic pathways (Conrad, 2005). Microorganisms preferably consume lighter isotopic species of an element leaving the residual substrate pool enriched in the heavier isotope and the newly formed product enriched in the lighter isotope (Whiticar, 1999). This kinetic isotope effect is larger for hydrogenotrophic than for acetoclastic methanogenesis (Krzycki et al., 1987).

Diffusing upwards from anaerobic sediments, CH<sub>4</sub> can be oxidized to CO<sub>2</sub> by methanotrophic microorganisms before reaching the atmosphere. The most abundant methanotrophs are aerobic methanotrophic Proteobacteria (Nazaries et al., 2013), specifically members of the classes *Alphaproteobacteria*, *Gammaproteobacteria* and *Verrucomicrobia* (Dedysh and Knief, 2018; Op Den Camp et al., 2009).

When the environment is depleted in O<sub>2</sub>, other electron acceptors such as NO<sub>3</sub><sup>-</sup> and NO<sub>2</sub><sup>-</sup> can be utilized in anaerobic oxidation of methane (AOM). Archaea from the ANME-2d clade like *Candidatus Methanoperedens nitroreducens* (*M. nitroreducens*) couple NO<sub>3</sub><sup>-</sup> reduction with CH<sub>4</sub> oxidation (Haroon et al., 2013; Arshad et al., 2015). Bacteria of the genus *Candidatus Methyloirabilis* of the NC10 phylum use NO<sub>2</sub><sup>-</sup> as electron acceptor (Ettwig et al., 2010; Graf et al., 2018; Versantvoort et al., 2018; He et al., 2016). Oswald et al. (2017) and Kits et al. (2015) found indications that *Crenothrix* and *Methylomonas denitrificans* are facultative anaerobic methanotrophs consuming NO<sub>3</sub><sup>-</sup> in O<sub>2</sub> depleted environments. Methane oxidation coupled to denitrification has been shown to occur in many freshwater environments including lakes (Einsiedl et al., 2020;

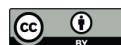

65 Graf et al., 2018; Deutzmann et al., 2014; Oswald et al., 2017; Norđi and Thamdrup, 2014; Peña Sanchez et al., 2022),  
reservoirs (Naqvi et al., 2018) and wetlands (Hu et al., 2014; Zhang et al., 2018; Zhu et al., 2015; Shen et al., 2017).

AOM can also be coupled to the reduction of sulfate (S-DAMO) and the metals Fe and Mn (M-DAMO) (Beal et al., 2009;  
Reeburgh, 1976). Evidence has accumulated that S-DAMO occurs in freshwater habitats (Van Grinsven et al., 2020; Eller et  
al., 2005; Schubert et al., 2011; Norđi et al., 2013; Segarra et al., 2015; Timmers et al., 2016; Ng et al., 2020) despite the low  
energy yield and typically low  $\text{SO}_4^{2-}$  concentrations. Consortia of methanotrophic ANME archaea (ANME 1, ANME 2a-2c  
70 and ANME-3) surrounded by sulfate reducing bacteria (SRB) can catalyze this process syntrophically (Boetius et al., 2000;  
Cui et al., 2015; Scheller et al., 2020).

Several recent studies have addressed the question which predictors best explain the spatiotemporal variability of  
methanogenesis and  $\text{CH}_4$  oxidation in rivers and streams. For example, Shen et al. (2019) compared potential AOM activity  
in different river sediments under laboratory conditions and found that the addition of  $\text{NO}_3^-$ ,  $\text{NO}_2^-$ ,  $\text{SO}_4^{2-}$  and  $\text{Fe}^{3+}$  could provoke  
75 AOM activity in sandy river beds, while no AOM could be stimulated in gravelly river beds. This is in line with findings by  
Shelley et al. (2015) and Bodmer et al. (2020) who measured increasing  $\text{CH}_4$  production and oxidation capacity with decreasing  
grain diameter. Other parameters stimulating  $\text{CH}_4$  production and oxidation in streams are high organic carbon contents  
(Bodmer et al., 2020; Romeijn et al., 2019; Bednařik et al., 2019; Crawford et al., 2017) and shading (Shelley et al., 2017).  
Further, methanogenic and methanotrophic activity in river sediments has been found to increase with rising temperature  
80 (Shelley et al., 2015; Comer-Warner et al., 2018).

While all these studies quantified potential  $\text{CH}_4$  production and oxidation rates in laboratory incubation experiments, only few  
studies have measured vertical geochemical gradients on-site to investigate the depth-distribution of redox zones in stream  
beds in the context of  $\text{CH}_4$  cycling. Exceptions are for example the work of Villa et al. (2020) who measured vertical profiles  
of  $\text{CH}_4$ ,  $\text{CO}_2$  and  $\text{N}_2\text{O}$  at different beach positions and water stages to examine the relation of hyporheic exchange and GHG  
85 emissions, and Ng et al. (2020) who used vertical geochemical profiles in combination with a multicomponent reactive  
transport model to study sulfur cycling and S-DAMO in a wetland-stream system. Yet, spatial patterns of methanogenic and  
 $\text{CH}_4$  oxidation zones in the HZ remain largely unexplored. Therefore, more field data are required to accurately describe how  
much  $\text{CH}_4$  is produced and consumed in streams, and under which conditions.

Attempting to fill this knowledge gap, we measured high-resolution depth-resolved geochemical profiles at different locations  
90 in a stream bed to study the spatial patterns of  $\text{CH}_4$  production and oxidation and to investigate the potential for AOM. As our  
study site we chose the HZ of a stream dominated by fine, organic-rich sediments that has a high potential to form and emit  
substantial amounts of  $\text{CH}_4$ . To support the interpretation of vertical concentration profiles of  $\text{O}_2$ ,  $\text{NO}_3^-$ ,  $\text{NO}_2^-$ ,  $\text{SO}_4^{2-}$  and  $\text{CH}_4$   
we measured stable carbon-isotopes of  $\text{CH}_4$ . In addition, quantitative PCR and sequencing of 16S rRNA genes were performed  
on a sediment core at one of the locations. The 1D numerical modeling software PROFILE (Berg et al., 1998) was used to  
95 support the interpretation of the measured geochemical profiles.

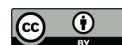

## 2 Materials and methods

### 2.1 Site characterization and determination of sediment properties

Five different sites in the hyporheic zone of river Moosach in Southern Germany were chosen for the sampling campaign in 2020 and 2021. River Moosach is a groundwater fed stream with a topographic catchment area of 175 km<sup>2</sup> which originates in two moor drainage ditches north of the city of Munich and runs along the border of two contrasting geological landscapes, the Tertiary Hill Country on the left and the Munich Gravel Plain on the right bank (Pulg et al., 2013; Auerswald and Geist, 2018). The river water can be characterized as a calcium-magnesium-bicarbonate type with elevated concentrations of chloride. Stream water chemistry is further characterized in Appendix A. Upstream of the points of measurement, the river crosses the 'Freisinger Moos', a heavily drained lowland moor area (Zehlius-Eckert et al., 2003). Human activities like damming, diversions and straightening measures have significantly altered the natural course and hydrological behavior of the Moosach since the Middle Ages (Pulg et al., 2013). Impoundments nowadays constitute about one third of the river's length leading to a decreased gradient, flow velocity and shear stress (Pulg et al., 2013). The Moosach river is subject to colmation and siltation, 51 % of the gravel bed is covered with fine deposits (Auerswald and Geist, 2018). Auerswald and Geist (2018) performed an extensive study on the composition of these fine deposits in river Moosach and found that on average 46 % were carbonates dominated by calcite, 38 % silicates and 16 % organic matter. Macrophytes cover approximately 15 % of the river bed which decreases average flow velocity due to increased hydraulic roughness (Braun et al., 2012). Braun et al. (2012) found average flow velocities above ground of 0.16 m s<sup>-1</sup> and 0.11 m s<sup>-1</sup> in cross sections with and without macrophytes, respectively.

The sampling sites are situated in the middle section of the river where the energy slope drops below the average of 1.3 ‰ to as low as 0.1 ‰ in some places and where fine deposits predominate (Auerswald and Geist, 2018). Stream water temperatures as recorded at a monitoring station of the Bavarian State Office of the Environment 4.5 km downstream of the sampling sites lie on average between 6.2 °C in January and 16.3 °C in July (Figure 1). The annual mean discharge of the Moosach is 2.46 m<sup>3</sup> s<sup>-1</sup>, low flow conditions generally prevail between July and September and high flow events are more common in winter and spring (Figure 1).

A schematic map of the five sampling locations and their placement in the river cross section is given in Figure 2a and b. At each site, a geochemical pore water profile was recorded as described in Sec. 2.2 and sediment grain size distributions were determined. Additionally, basic chemical parameters of the surface water (temperature, dissolved oxygen concentration, pH and electrical conductivity) were measured at each sampling day. For location C, an additional sediment core was taken for microbiological analyses.

Detailed information on sampling periods, surface water chemistry and sedimentary composition of each sampling site is given in Appendix A. In short, at each site a high-resolution geochemical profile was measured with an equilibrium dialysis sampler (peeper) which remained in the sediment for at least three weeks. Sediment composition was analyzed with sieve-slurry analyses following the DIN EN ISO 17892-4 standard (Fig. A1). With 65-75 % silt and clay, the most fine-grained material is found at the right banks at locations A and E. At the outside bend of the right bank (location B) a clear stratification was found

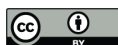

with gravel between 0-11 cm depth and sandy silt below. Deposits at location C consisted of 60-63 % silt and clay. At location  
 130 D, central in the river, sand had the main fraction with 66-79 %.

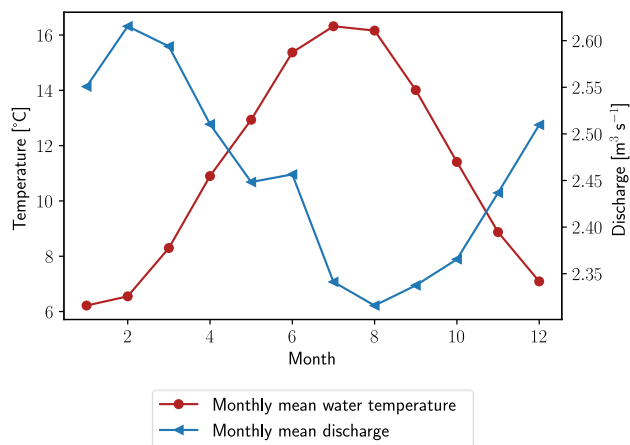

135 **Figure 1: Monthly mean stream water temperature und discharge.** Average calculations are based on stream temperature data from 2011-2021 and discharge data from 1988-2021 at gauging station Freising Moosach (river chainage: 9.45 km, 4.5 km downstream of the sampling sites), as retrieved from the Bavarian State Office of the Environment.

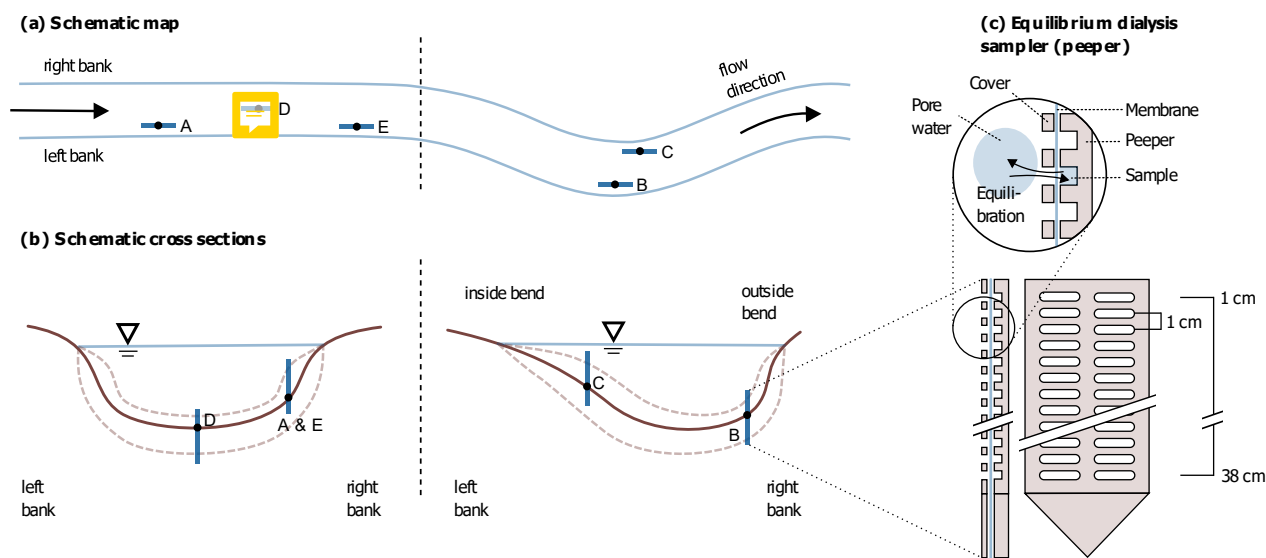

140 **Figure 2: Schematic representation of the five sampling sites along the river (a) and across the river bed (b). In (c), the sampler is schematically drawn, modified after Teasdale et al. (1995) (top: detail, bottom left: side view; bottom right: front view; for clarity, only 12 of the 38 chambers are illustrated).**



## 2.2 Pore-water sampling with a sediment peeper

High-resolution geochemical depth-profiles were obtained at each sampling site with an in-situ equilibrium dialysis sampler (peeper) as described by Hesslein (1976) (see Figure 2c). The body of the peeper was equipped with two rows of 38 chambers  
145 in a spatial depth-resolution of 1 cm. All chambers were filled with de-ionized water, covered with a semi-permeable polysulfone membrane with a pore-diameter of 0.2  $\mu\text{m}$  (Pall Corporation, Dreieich, Germany) and fixed with a Plexiglas (PMMA) cover and plastic screws. At each sampling site, the peeper was pushed manually into the stream bed until most chambers were buried in the sediment and only the uppermost chambers had contact with river water.

An equilibrium between the water in the chambers and the surrounding pore-water was obtained by diffusion of dissolved  
150 molecules through the membrane during a time period of at least three weeks. This exceeds the recommended equilibration time of minimally two weeks (Teasdale et al., 1995). The extended equilibration time was chosen to allow for recovery of natural geochemical gradients after the disruption caused by placing the peeper. Pore-water samples represent an average of pore water concentrations during the sampling period and diurnal or other short-term temporal fluctuations during this time cannot be detected.

155 For sampling, the peeper was removed from the sediment and cleaned with de-ionized water. The first column of chambers was used for oxygen measurements and withdrawal of samples for determination of ion concentrations, and the second column was used for  $\text{CH}_4$  concentration measurements and analyses of stable carbon isotopes of  $\text{CH}_4$ . A Clark-type microsensor (Unisense A/S, Aarhus, Denmark) was pierced through the membrane for immediate measurements of dissolved  $\text{O}_2$  in the field. The  $\text{O}_2$  measurements were conducted on-site within 10 min after removal of the peeper from the sediments to avoid  
160 contamination with atmospheric  $\text{O}_2$ . Liquid samples were then drawn from the same chambers with 5 ml syringes.

Vials for  $\text{CH}_4$  concentration measurements and stable carbon isotope analysis ( $\delta^{13}\text{C}-\text{CH}_4$ ) were prepared in the laboratory with 20  $\mu\text{l}$  10 M NaOH, sealed with rubber butyl stoppers and flushed for at least 2 min with synthetic air ( $\text{O}_2$ ,  $\text{N}_2$ ) to remove background atmospheric  $\text{CH}_4$ . Immediately before sample injection, a small needle was pushed through the stoppers to allow pressure exchange. Subsequently, samples were injected into the vials with a syringe and needle. Both needles were removed  
165 directly after sample injection. To avoid  $\text{CH}_4$  loss to the atmosphere through the membrane, sampling was conducted quickly within 15 min after removal from the sediment. Samples for ion concentrations were collected in 1.5 ml glass vials and prepared with 10  $\mu\text{l}$  0.5 M NaOH for anion analysis ( $\text{Cl}^-$ ,  $\text{NO}_3^-$ ,  $\text{NO}_2^-$ ,  $\text{SO}_4^{2-}$ ) or 10  $\mu\text{l}$  1M  $\text{HNO}_3$  for cation analysis ( $\text{NH}_4^+$ ). All samples were withdrawn within 45 min after removal of the peeper. The samples were transported to the laboratory in a cooler and stored refrigerated prior to analysis.

170



## 2.3 Chemical and isotopic analyses

### Anion and cation measurements

175 Anion and cation concentrations were determined using ion chromatography, specifically a system of two *Dionex ICS-1100*  
(Thermo Fisher Scientific, Dreieich, Germany) equipped with *Dionex IonPac™ AS9HC* and *CS12A* columns for anion and  
cation separation, respectively. Measurements were performed in triplicates and evaluated on the basis of 7 concentration  
standards (Merck KGaA, Darmstadt, Germany). Concentrations are given as mean values of the triplicates. Analytical  
uncertainty was <10 % and detection limits were 0.020 mmol L<sup>-1</sup> for Cl<sup>-</sup>, 0.012 mmol L<sup>-1</sup> for NO<sub>3</sub><sup>-</sup>, 0.007 mmol L<sup>-1</sup> for NO<sub>2</sub><sup>-</sup>,  
180 0.008 mmol L<sup>-1</sup> for SO<sub>4</sub><sup>2-</sup> and 0.005 mmol L<sup>-1</sup> for NH<sub>4</sub><sup>+</sup>.

### CH<sub>4</sub> concentrations and δ<sup>13</sup>C measurements of CH<sub>4</sub>

Methods for CH<sub>4</sub> sampling and concentration measurements are further developments of standards introduced by the EPA  
(2001). Sample vials were equilibrated in a water bath at 30 °C for at least 2 h before measurements of headspace CH<sub>4</sub>  
concentrations with a *Trace 1300* Gas Chromatograph (GC) (Thermo Fisher Scientific, Dreieich, Germany). The GC was  
185 equipped with a *TG-5MS* column and flame ionization detector (FID) and calibrated with three standards (Riessner Gase  
GmbH, Lichtenfels, Germany), Triplicate measurements were performed through manual injection of 250 µl headspace gas.  
Total CH<sub>4</sub> concentrations in water and gas phase of the sample vials were calculated with Henry's Law according to the  
equilibrium headspace method first described by Kampbell and Vandegrift (1998).

The same sample vials were used for measuring <sup>12</sup>C/<sup>13</sup>C ratios of CH<sub>4</sub> with Cavity Ring-Down Spectroscopy (CRDS),  
190 specifically the *G2201-i* Gas Analyzer with a Small Sample Introduction Module (SSIM) (Picarro Inc., Santa Clara, USA)  
calibrated with two standards (Airgas, Plumsteadville, USA). Reliable results could only be obtained for headspace CH<sub>4</sub>  
concentrations >30 ppm. This threshold concentration was found in previous experiments (Appendix B). Due to the small  
available gas volume in the headspace of approximately 7 ml, dilution with synthetic air was necessary and CH<sub>4</sub> concentrations  
in the analyzer decreased while repeating measurements. Values were only adopted when at least two of three measurements  
195 were above the threshold concentration. The standard δ notation is used for representing the results according to Eq. (1) relative  
to the VPDB standard.

$$\delta[\text{‰}] = \left( \frac{R_{\text{Sample}}}{R_{\text{Standard}}} - 1 \right) \cdot 10^3 \quad (1)$$

### 2.4 Inverse modeling of concentration gradients

The one-dimensional numerical modeling software PROFILE, introduced by Berg et al. (1998), was used to support the  
200 interpretation of measured geochemical profiles. The software provides an objective procedure for finding the simplest  
production-consumption profile which accurately represents the measured concentration gradients. For this, concentration  
profiles are divided into different zones with constant production/consumption rates. Then, several best fit results are produced  
by minimizing the sum of squared deviations (SSD), each representing a different number of these zones. Finally, best fits are  
compared using statistical F-testing for finding the lowest number of zones which best describe the data.



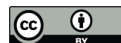

205 The model assumes concentration gradients to represent steady state (Berg et al., 1998) which neglects the fact that reaction rates in the HZ show temporal variability (Marzadri et al., 2012). However, the pore-water samples obtained with the sediment peeper represent a time-averaged state during the total sampling period of at least 3 weeks. The relative contribution of short-term fluctuations decreases with the length of the averaged time. Therefore, as a first approximation we assume that after 3 weeks this dynamic component is small particularly in the deeper HZ and can be neglected.

210 Boundary conditions (BCs) were set as follows: for O<sub>2</sub>, NO<sub>3</sub><sup>-</sup> and SO<sub>4</sub><sup>2-</sup> a fixed concentration was set the top and a zero flux BC at the bottom of the profile; for CH<sub>4</sub> a fixed concentration and zero flux BC were set at the top of the profile, similar to what was used by Norði and Thamdrup (2014). Positive production rates were only allowed for SO<sub>4</sub><sup>2-</sup> and CH<sub>4</sub> while for O<sub>2</sub> and NO<sub>3</sub><sup>-</sup> only negative rates (consumption) were permitted. Bioturbation and irrigation were neglected. Molecular diffusion coefficients in water D<sup>0</sup> (m<sup>2</sup> s<sup>-1</sup>) were calculated based on Boudreau (1997) as a function of the average water temperature

215 during the equilibration period. Sediment diffusion coefficients D<sub>s</sub> were determined as a function of D<sup>0</sup> based on an empirical relation (Iversen and Jørgensen, 1993). More details and calculated diffusion coefficients D<sup>0</sup> and D<sub>s</sub> are given in Appendix C.

## 2.5 DNA extraction, qPCR and 16S rRNA gene sequencing

At location C, an additional sediment core was taken for depth-resolved microbiological analyses via DNA extraction, quantitative PCR and 16S rRNA gene sequencing. For this, a coring tube with an inner diameter of 42 cm was cut open

220 lengthwise, cleaned with ethanol and distilled water and closed again with tape. The core was taken by manually pushing the tube into the sediment right next to the peeper, pulling it out and transferring it to the laboratory. There, the tape was removed for opening the tube and allowing access to the sediment core. The sediment was split into 10 subsamples with a resolution of 2 cm in the upper 12 cm depth and 3 cm below. All samples were immediately frozen and stored at -22 °C until further analysis. For each sampled depth, we performed four biological replicates of DNA extraction. Total DNA was extracted from 0.5 g of

225 sediment as previously described (Vuillemin et al., 2019). DNA templates were diluted 1:100 in ultrapure PCR water (Roche, Germany) and used in qPCR amplifications with updated 16S rRNA gene primer pair 515F (5'- GTG YCA GCM GCC GCG GTA A -3') and 806R (5'- GGA CTA CNV GGG TWT CTA AT -3') to increase our coverage of archaea and marine clades and run as previously described (Pichler et al., 2018). All qPCR reactions were set up in 20 µL volumes with 4 µL of DNA template, 20 µL SsoAdvanced SYBR Green Supermix (BioRad, Feldkirchen, Germany), 4.8 µL Nuclease-free H<sub>2</sub>O (Roche,

230 Germany), 0.4 µL primers (10 µM; biomers.net) and 0.4 µL MgCl<sub>2</sub> and carried out on a CFX-Connect qPCR machine for gene quantification. For 16S rRNA genes, we ran 40 PCR cycles of two steps corresponding to denaturation at 95 °C for 15 s, annealing and extension at 55 °C for 30 s. All qPCR reactions were set up in 20 µL volumes with 4 µL of DNA template and performed as previously described (Coskun et al., 2019). Gel purified amplicons of the 16S rRNA genes were quantified in triplicate using QuantiT dsDNA reagent (Life Technologies, Carlsbad, USA) and used as a standard. An EpMotion 5070

235 automated liquid handler (Eppendorf, Hamburg, Germany) was used to set up all qPCR reactions and to prepare the standard curve dilution series spanning from 10<sup>7</sup> to 10<sup>1</sup> gene copies. Reaction efficiency values in all qPCR assays were between 90 % and 110 % with R<sup>2</sup> values >0.95 for the standards.





For 16S rRNA gene library preparation, qPCR runs were performed with barcoded primer pair 515F and 806R as described previously (Pichler et al., 2018). In brief, 16S rRNA gene amplicons were purified from 1.5 % agarose gels using the QIAquick  
240 Gel Extraction Kit (Qiagen, Hilden, Germany), quantified with the Qubit dsDNA HS Assay Kit (Thermo Fisher Scientific, Dreieich, Germany), normalized to 1 nM solutions and pooled. Library preparation was carried out according to the MiniSeq System Denature and Dilute Libraries Guide (Illumina, San Diego, USA). Sequencing was performed on the Illumina MiniSeq platform at the Geo-Bio LMU Center. We used USEARCH version 10.0.240 for MiniSeq read trimming and assembly, OTU  
245 picking and 97 % sequence identity clustering (Edgar, 2013), which, as we showed previously, captures an accurate diversity represented within mock communities sequenced on the same platform (Pichler et al., 2018). OTU representative sequences were identified by BLASTn searches against SILVA database version 132 (Quast et al., 2012). To identify contaminants, 16S rRNA genes from extraction blanks and dust samples from the lab were also sequenced in triplicate (Pichler et al., 2018). These 16S rRNA gene sequences were used to identify any contaminating bacteria (e.g. *Acinetobacter*, *Bacillus*, *Staphylococcus*) and selectively curate the OTU table.

## 250 3 Results and discussion

### 3.1 Concentration profiles show steep geochemical gradients and the formation of a complex redox zonation

The geochemical profiles obtained in the HZ of river Moosach are shown in Figure 3. The total depth of the profiles depends on how deep the peeper was pushed into the ground and varied between 27 cm and 38 cm. Above the sediment-water interface, in-stream concentrations were 270-300  $\mu\text{mol L}^{-1}$  for dissolved  $\text{O}_2$ , 280-380  $\mu\text{mol L}^{-1}$  for  $\text{NO}_3^-$ , 240-360  $\mu\text{mol L}^{-1}$  for  $\text{SO}_4^{2-}$  and  
255 1270-1650  $\mu\text{mol L}^{-1}$  for  $\text{Cl}^-$ . Surface water concentrations as measured on the day of sampling are displayed as vertical beams above the sediment-water interface in Fig. 2a and c.

Land-use in the catchment is predominantly agriculture and leaching of fertilizers presumably adds  $\text{NO}_3^-$  to river and groundwater, but values stayed clearly below the threshold of the EU Nitrates Directive of 50  $\text{mg L}^{-1}$  (806  $\mu\text{mol L}^{-1}$ ).  $\text{SO}_4^{2-}$  concentrations in the surface water were strikingly high for a freshwater river, especially in spring. Groundwater in the  
260 quarternary aquifer, the groundwater body hydraulically connected to the river, showed  $\text{SO}_4^{2-}$  concentrations between 448 and 573  $\mu\text{mol L}^{-1}$  during 2007-2020 as measured in an observation well approximately 1.6 km south-west of the sampling sites (Bavarian State Office of the Environment). Peat can contain substantial amounts of carbon-bonded sulfur and pyritic sulfides (Spratt Jr et al., 1987; Casagrande et al., 1977) and  $\text{SO}_4^{2-}$  can be released due to pyrite and organic matter oxidation (Vermaat et al., 2016), likely so in the drained moor areas in the foothills of the Munich Gravel Plain that the Moosach river crosses. In  
265 an agricultural watershed sulfur fertilizers can also be a source of elevated  $\text{SO}_4^{2-}$  concentrations in shallow aquifers (Spoelstra et al., 2021).

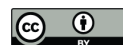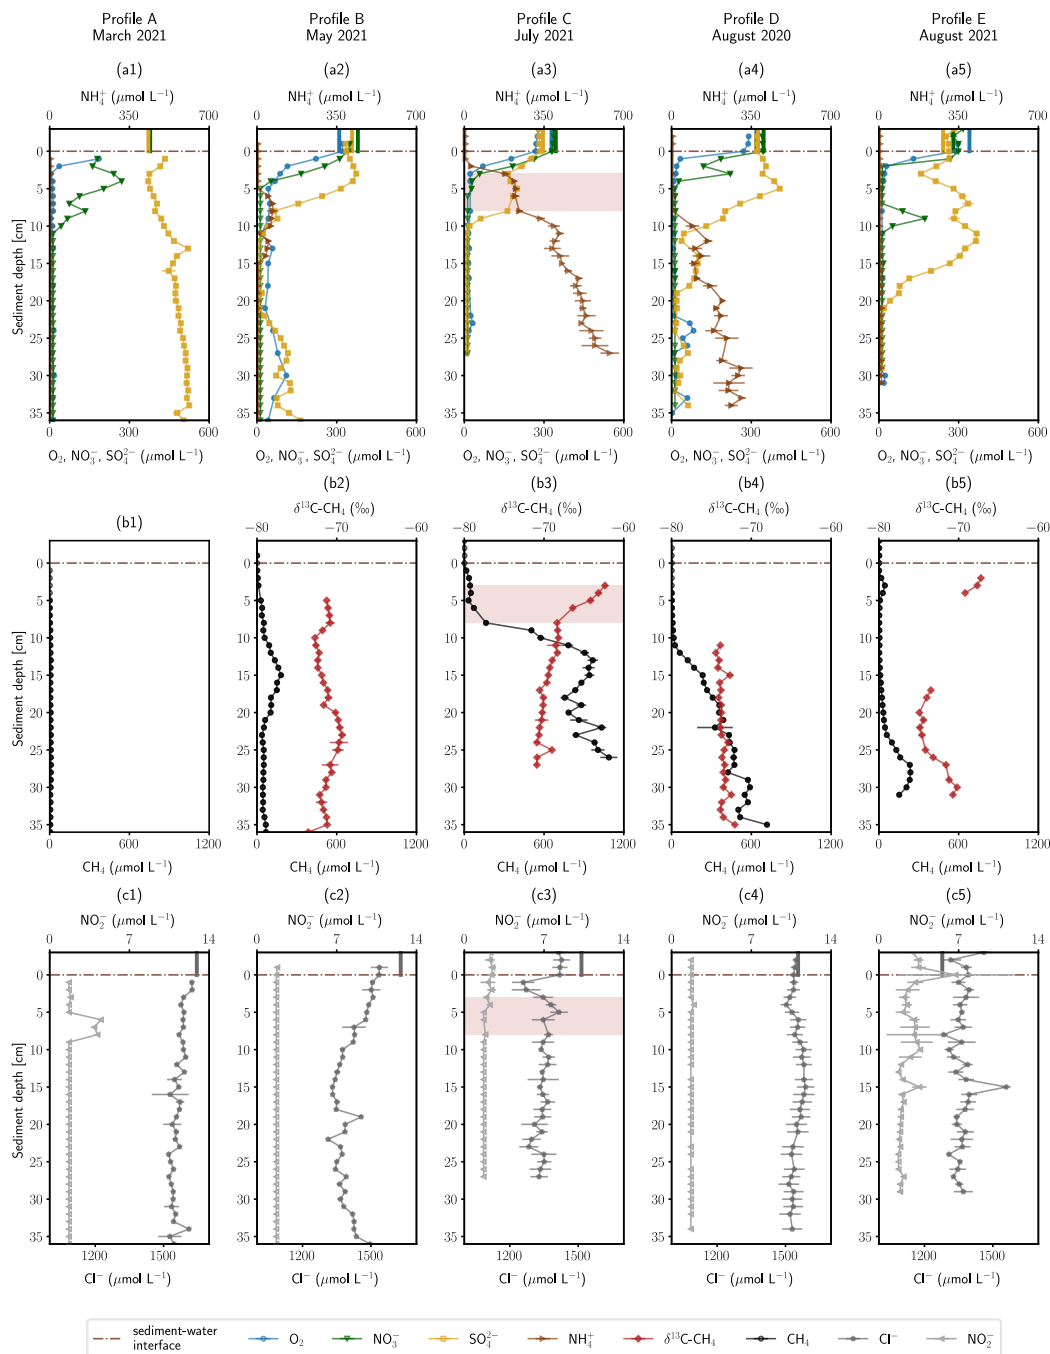

**Figure 3: Depth-resolved profiles of hyporheic pore-water geochemistry at five sampling sites.** Panels (a1) to (a5) show  $O_2$ ,  $NO_3^-$ ,  $NH_4^+$  and  $SO_4^{2-}$  concentrations, panels (b1) to (b5)  $CH_4$  concentrations and  $\delta^{13}C-CH_4$  values and panels (c1) to (c5)  $NO_2^-$  and  $Cl^-$  concentrations. Empty markers indicate values outside the range of used standards. Error bars show standard deviations of independent measurements ( $n=3$ ). Vertical lines above the sediment-water interface are concentrations measured in the surface water at the sampling date. Red background color highlights an enrichment in  $\delta^{13}C-CH_4$ . Profiles are ordered by season.

270



Below the sediment-water interface dissolved  $O_2$  concentrations decreased within few centimeters in all sampled profiles and remained at  $<10 \mu\text{mol L}^{-1}$  deeper down with only few exceptions. Steep  $O_2$  gradients and anoxic conditions just below this narrow aerobic zone were to be expected, because the river Moosach is strongly altered by human engineering including controlled discharge conditions, a very low gradient, slow flow velocities and deposits of fine, organic-rich materials. In profile B,  $O_2$  concentrations were higher compared to all other sites ( $20\text{-}80 \mu\text{mol L}^{-1}$  below 3 cm depth). This may be due to higher surface water influxes in the coarser gravelly sediment as opposed to the fine deposits found at the other sites. However, even between 10-20 cm depth, where  $CH_4$  concentrations peaked in a sedimentary layer dominated by silt,  $O_2$  was present at concentrations between 20 and  $60 \mu\text{mol L}^{-1}$ . These high  $O_2$  concentrations appear to be rather implausible in this zone where  $CH_4$  is produced through methanogenesis, a strictly anaerobic process. An explanation could, however, be contamination with atmospheric  $O_2$  during field measurements. Similarly, profile D shows anomalies in the  $O_2$  data with concentration peaks at 23-26 cm, 30 cm and 33 cm depth. These may also be attributed to measurement artefacts since they are located deep in the methanogenic zone where strictly anoxic conditions generally prevail.

Similar to dissolved  $O_2$ ,  $NO_3^-$  concentrations decreased from  $280\text{-}380 \mu\text{mol L}^{-1}$  in river water to concentrations of  $<12 \mu\text{mol L}^{-1}$  (detection limit) within a few centimeters. In contrast, the conservative tracer  $Cl^-$  did not disappear in a comparable manner which may demonstrate that microbial consumption and not dilution or mixing was responsible for the development of these steep chemical gradients. A peak of  $NO_2^-$  in profile A exactly where the  $NO_3^-$  gradient is located (6-8 cm) indicates bacterial  $NO_3^-$  reduction to  $NO_2^-$ , possibly as an intermediate in denitrification (Fig. 2c). In profiles B-E  $O_2$  reduction and denitrification zones were very close and both gradients overlapped. Oxygen reduction and denitrification zones seem to be only millimeters wide, similar to what was described for other freshwater sediments in the literature (Raghoebarsing et al., 2006). In profile D a peak between 8-10 cm depth with a maximum of  $173 \mu\text{mol L}^{-1}$  stands out that coincides with a reduction of  $SO_4^{2-}$  concentrations.

$SO_4^{2-}$  concentration profiles showed some distinctive features. In profiles A and B, concentrations slightly increased towards the bottom of the profile. This could be connected to the intrusion of upwelling, reduced groundwater with a higher  $SO_4^{2-}$  concentration compared to surface water. Rising  $Cl^-$  concentrations in the lower third of profile B support this interpretation, since they reach  $1491 \mu\text{mol L}^{-1}$ , a value very similar to groundwater  $Cl^-$  concentrations of  $1440\text{-}1495 \mu\text{mol L}^{-1}$  in recent years (2016-2020) (Bavarian State Office of the Environment). Further, in profiles B and D,  $SO_4^{2-}$  concentrations increased in the upper parts of the profiles in 0-3 cm and 0-5 cm depth, respectively, and also in profile E between 3-7 cm and 9-11 cm depth. Here, a biogeochemical source, for example re-oxidation of  $H_2S$  travelling upwards from more reduced zones, could explain the observed trends. Below, in 3-11 cm (profile B), 5-11 cm (profile C) and 12-22 cm depth (profile E) concentrations declined, potentially through bacterial  $SO_4^{2-}$  reduction. This interpretation is supported by a sulfidic smell during sampling. Interestingly, in profile C  $SO_4^{2-}$  concentrations decreased significantly not only between 8-11 cm, but also between 0-3 cm depth, concurrently with decreases in  $O_2$  and  $NO_3^-$  concentrations. One possible interpretation is a dilution effect at the clogged



sediment surface, as also suggested by simultaneous decreases in  $\text{Cl}^-$  (Fig. 3c) and  $\text{Ca}^{2+}$  (data not shown) concentrations. But the data could also show the co-occurrence of oxic and anoxic micro-niches in close proximity, a situation that has also been described previously (Storey et al., 1999; Triska et al., 1993).

$\text{NH}_4^+$  concentrations in most profiles (C-E) consistently increased with sediment depth. While maximal concentrations in profiles C and D were  $116 \mu\text{mol L}^{-1}$  and  $308 \mu\text{mol L}^{-1}$ , respectively, in profile C values reached a level of  $>1000 \mu\text{mol L}^{-1}$ . During biodegradation of organic matter,  $\text{NH}_4^+$  is released when nitrogenous compounds are transformed through ammonification (Ladd and Jackson, 1982). Increases with depth show progressive decomposition and high  $\text{NH}_4^+$  concentrations can be seen as a proxy for a high content of microbially degraded organic matter in the sediment. Thus, organic carbon content seems to be significantly lower in location E compared to C and D. In location A,  $\text{NH}_4^+$  concentrations even stayed below the detection limit ( $<5 \mu\text{mol L}^{-1}$ ). Profile B has elevated  $\text{NH}_4^+$  concentrations in 6-14 cm depth and values below the detection limit elsewhere.

Similar to  $\text{NH}_4^+$  concentrations,  $\text{CH}_4$  concentrations generally increased with depth and were highest in profile C, followed by profile D. In profile A, where  $\text{NH}_4^+$  concentrations were lowest compared to all other profiles,  $\text{CH}_4$  concentrations stayed below  $10 \mu\text{mol L}^{-1}$ . More complex were the observed  $\text{CH}_4$  gradients in profiles B and D. In profile B,  $\text{CH}_4$  peaked at a concentration of  $180 \mu\text{mol L}^{-1}$  in a sediment depth of 15 cm. Below, from 23 cm onwards, concentrations decreased and stayed around  $50 \mu\text{mol L}^{-1}$ .  $\text{CH}_4$  concentrations of profile E revealed a small peak ( $44 \mu\text{mol L}^{-1}$ ) at 3 cm depth, showed very low concentrations of  $<10 \mu\text{mol L}^{-1}$  between 5-15 cm and rose again up to  $237 \mu\text{mol L}^{-1}$  at a depth of 28 cm.

Generally, a tendency of increasing  $\text{CH}_4$  concentrations with higher surface water temperatures can be observed. Profiles A and B, measured in spring, showed significantly lower  $\text{CH}_4$  production than those sampled in summer. However, comparing profiles C, D and E, all measured in summer, substantial differences in total  $\text{CH}_4$  concentrations are eye catching. By far the highest  $\text{CH}_4$  concentrations were measured in July 2021 ( $T_M = 16.6 \text{ }^\circ\text{C}$  for profile C, Tab. A1) although surface water temperatures were slightly lower than in August 2020 ( $T_M = 17.1 \text{ }^\circ\text{C}$  for profile D). Concentrations in profile C even seem to have exceeded saturation pressure leading to the formation of gas bubbles. This is inferred from extraordinarily high  $\text{CH}_4$  concentration of  $19800 \mu\text{mol L}^{-1}$  measured in 27 cm depth (not displayed in Fig. 3 since it is far out of the axes' range) that implies direct contact with a gas bubble. In comparison, profile E, measured in August 2021, exhibits low concentrations despite the summer temperatures ( $T_M = 15.8 \text{ }^\circ\text{C}$ ). Varying organic matter contents at the three sites might explain these differences and seems to be a determining parameter for total  $\text{CH}_4$  production, as inferred from differences in  $\text{NH}_4^+$  concentrations. When complex organic molecules are degraded by microbes, not only  $\text{NH}_4^+$  is released, but also educts for methanogenesis like  $\text{H}_2$ ,  $\text{CO}_2$ , acetate and methylated compounds like methanol (Capone and Kiene, 1988). The degradation of organic carbon is therefore a driver of methanogenesis and we see a correlation between  $\text{CH}_4$  and  $\text{NH}_4^+$  concentrations. This finding is also consistent with previous reports from stream sediment incubations (Bodmer et al., 2020; Romeijn et al., 2019; Bednařik et al., 2019; Crawford et al., 2017).



Cl<sup>-</sup> can be viewed as a conservative tracer. As mentioned above, one irregularity is a sudden concentration decrease in the first centimeters of profile C. This could show the effect of clogging, because fine deposits fill the pore space and reduce hyporheic exchange. Interesting is also that Cl<sup>-</sup> concentrations decrease in the middle section of profile B. Cl<sup>-</sup> concentrations in profiles A, D and E do not exhibit any trends, fluctuations are highest in profile E.

### 3.2 Explaining redox zones with sediment heterogeneities and hyporheic exchange fluxes

Observed concentration profiles at the different stream sites showed distinct characteristics and were very heterogeneous. The divergence of the profiles becomes particularly clear when comparing profiles A and E that show hardly any similarities although they were sampled at two very similar sites. In March, where river water is well oxygenated with average surface water temperatures of 7.5 °C (profile A), SO<sub>4</sub><sup>2-</sup> concentrations were high (>300 μmol L<sup>-1</sup>) throughout the profile and almost no CH<sub>4</sub> was produced. In August (profile E), clear gradients in SO<sub>4</sub><sup>2-</sup> and CH<sub>4</sub> concentrations together with nearly constant Cl<sup>-</sup> concentrations point towards a high activity of SRB and methanogens. As mentioned earlier, higher stream water temperatures in summer (profile E) could be the reason for higher microbial activity compared to early spring (profile A). However, the influence of temperature on GHG emissions from rivers has been discussed controversially. Increasing GHG production with rising temperatures was observed in laboratory incubations of river sediments (Comer-Warner et al., 2018; Shelley et al., 2015) while Silvennoinen et al. (2008) found that 55 % of all CH<sub>4</sub> emissions from the Temmesjoki River were released during winter time.

In our data, temperature alone may not explain the differences between the two profiles A and E. Concentration gradients in profile E do not follow the generally known redox zonation (Canfield and Thamdrup, 2009). The assumption that stream water enters the HZ at the stream-water interface and that electron acceptors are consumed successively can neither explain the complex SO<sub>4</sub><sup>2-</sup> dynamics, nor the deep NO<sub>3</sub><sup>-</sup> peak. A possible reason could be surface water entering the sediment bank from the side, maybe in a sandier layer, such that sample depths represent different and varying flow path lengths of hyporheic fluxes. This is further illustrated in Fig. 4e. Stream water entering the bank from the side could be an additional reason (besides cold temperatures and potentially low organic matter degradation) for low CH<sub>4</sub> levels in profile A (Fig. 4a). Figure 4 schematically shows the hypothesized sedimentary characteristics and potential hyporheic fluxes at all five sampling sites.

Sediment stratification and resulting hyporheic fluxes can also help in understanding profile B. In the top section, as it would be expected, O<sub>2</sub>, NO<sub>3</sub><sup>-</sup> and SO<sub>4</sub><sup>2-</sup> are consumed consecutively and CH<sub>4</sub> concentrations rise, but below 15 cm depth, we see the reverse trends. A lens of fine material in an otherwise gravelly sediment would be a plausible explanation for this observation (Fig. 4b). In fact, very fine sediment was found below 11 cm depth and gravel above, but the sediment core did not cover the lowest part of the profile (Appendix A). Hyporheic flow velocities outside the fine lens would be faster than inside and thus, although path lengths at the bottom are longer, contact times have been shorter than in the central part of the profile. This would mean that we see the methanogenic zone in the central part and the sulfate reduction zone at the bottom of profile B, depending on the available time for reactions along the flow path.



370 Also profile C deviated from the commonly assumed redox zonation. Bacterial  $\text{SO}_4^{2-}$  reduction appeared to occur concurrently with  $\text{O}_2$  reduction and denitrification, possibly in co-occurring oxic and anoxic zones (Storey et al., 1999). Alternatively, this may be caused by dilution effects in the upper centimeters of the profile. Also unexpected were stagnating  $\text{SO}_4^{2-}$  concentrations with a slightly convex concentration gradient between 3-8 cm depth. There might be an additional  $\text{SO}_4^{2-}$  source, maybe recycling of reduced sulfur species from deeper zones or some cryptic sulfur cycling as has been suggested in the context of

375 S-DAMO in freshwater environments (Ng et al., 2020; Norði et al., 2013). But also here, heterogeneous flow paths, for example due to wood and plant parts, could affect measured profiles such that water travel times do not linearly increase with depth. The profile most clearly following the thermodynamic sequence was profile D. Here,  $\text{O}_2$  was consumed first, followed by  $\text{NO}_3^-$  and bacterial  $\text{SO}_4^{2-}$  reduction. Only after all other electron acceptors were consumed,  $\text{CH}_4$  concentrations began to rise with depth. The central part of a river bed has been called a “river’s liver” due to its good connection to the stream compared to

380 nearshore sediments (Fischer et al., 2005).

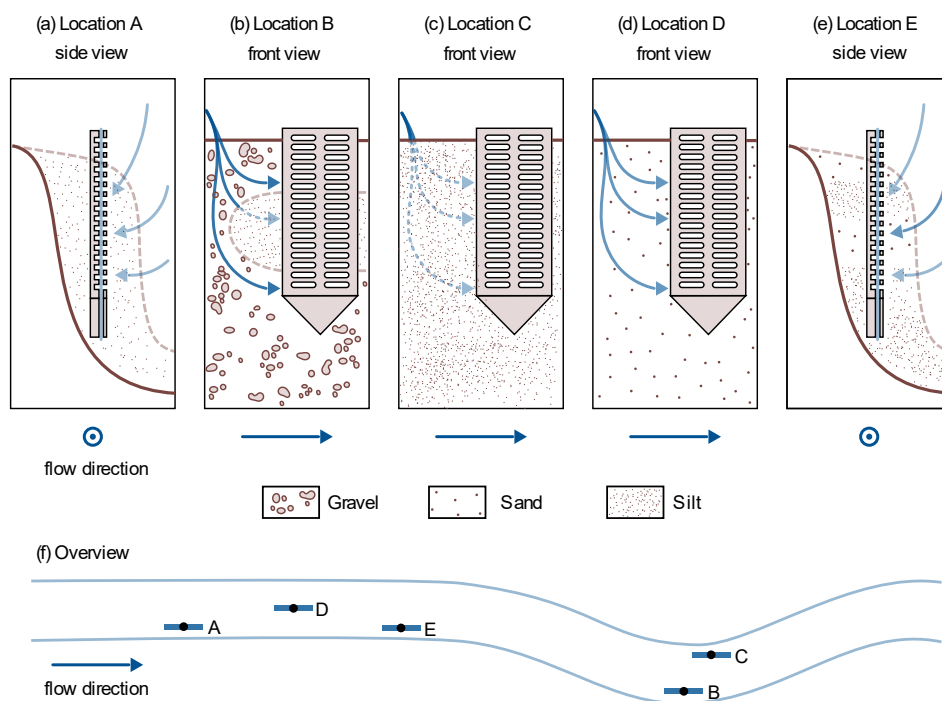

385 **Figure 4: Schematic representation of potential hyporheic flow paths (blue arrows) at the five sampling sites.** For locations A and E, a side view was chosen and for locations B, C and D a front view. Where the front view is shown, flow direction in the river is from left to right and where the side view is shown flow direction is out of the drawing plane. The color strength of the arrows corresponds to the expected magnitude of hyporheic fluxes. The sediment composition is schematically indicated. Quantitative data on the sediment composition at the five locations can be found in Appendix A.



### 3.3 Stable carbon isotopes of CH<sub>4</sub> reveal the importance of hydrogenotrophic methanogenesis and the roles of diffusive versus biotic processes in reducing CH<sub>4</sub> concentrations beneath the sediment surface

390 Figure 3 also shows measured  $\delta^{13}\text{C-CH}_4$  values for Profiles B - E in panels (b1) to (b5). CH<sub>4</sub> concentrations at location A were too low for isotopic analyses. In profile B,  $\delta^{13}\text{C-CH}_4$  values were on average -74 ‰.  $\delta^{13}\text{C-CH}_4$  values were very similar, but slightly shifted in a range of <3 ‰ with an increasing trend (top to bottom) between 5-8 cm and 10-23 cm depth and a decreasing trend between 8-12 cm and 23-31 cm depth. These variations were too small to be taken as an indication for any

395 microbially mediated processes and could be explained by diffusion controlled isotope fractionation. In profile C on the other hand, two sections are clearly evident. From bottom to top, between 27 cm and 8 cm depth,  $\delta^{13}\text{C-CH}_4$  values increased almost linearly from -71 ‰ to -69 ‰, then the slope changed abruptly and an isotopic enrichment from -69 ‰ to -62 ‰ can be seen between a sediment depth of 8 cm and 3 cm. Isotopically lighter <sup>12</sup>CH<sub>4</sub> is transported and consumed faster than heavier <sup>13</sup>CH<sub>4</sub> which leads to an isotopic enrichment of the remaining CH<sub>4</sub> pool in the heavier <sup>13</sup>CH<sub>4</sub> (Whiticar et al., 1986). This isotopic shift towards heavier isotopes from 8 cm to 3 cm combined with decreasing CH<sub>4</sub> concentrations, therefore, clearly indicates microbial CH<sub>4</sub> consumption. Interestingly, the measured O<sub>2</sub> gradient lied above this zone (0-3 cm depth), while denitrification potentially occurred in exactly this depth (0-5 cm) and SO<sub>4</sub><sup>2-</sup> concentrations stagnated around 176 μmol L<sup>-1</sup> in 3-8 cm depth. Inverse modeling and the microbial community distribution at location C may help interpreting the details of CH<sub>4</sub> oxidation as outlined in detail below (Sec. 3.4 and 3.5). The zone of <sup>13</sup>CH<sub>4</sub> enrichment in profile C, where

400 CH<sub>4</sub> oxidation is inferred, is highlighted by a red background color in Fig. 3 & 5 to visually help differentiating this zone from the rest of the profile. The slight isotopic enrichment of  $\delta^{13}\text{C-CH}_4$  of a few per mil below, between 27 cm und 8 cm depth, is likely affected by diffusion-controlled stable isotope fractionation. It is striking that CH<sub>4</sub> concentrations steeply decrease already between 12 cm and 8 cm depth, beneath the zone of strong <sup>13</sup>CH<sub>4</sub> enrichment. In this lower part of the gradient, CH<sub>4</sub> transport from the methanogenic zone upwards appears to be diffusion-limited, similar to what can be observed in profiles B,

405 D and E.

In profile D,  $\delta^{13}\text{C-CH}_4$  values were on average -71 ‰ and the isotopic composition stayed nearly constant. At least above 10 cm depth, where CH<sub>4</sub> concentrations were high enough for repeated isotope measurements, results suggest that microbial CH<sub>4</sub> oxidation did not play a key role in removing CH<sub>4</sub> from the HZ at location D. In profile E, reliable  $\delta^{13}\text{C-CH}_4$  values could only be obtained in 2-4 cm and 17-21 cm depth. In the upper zone, values lay between -67 ‰ and -69 ‰, in the lower between

415 -71 ‰ and -75 ‰ with a tendency towards less negative values in the lowest part of the profile. Since differences between isotope values at the top and the bottom were within a few per mil and there is a large data gap between 5-16 cm, data interpretations are difficult. The slightly heavier carbon isotopes of CH<sub>4</sub> at the top of the profile may be an indication for aerobic or anaerobic oxidation, but there is no additional evidence for this interpretation.

$\delta^{13}\text{C-CH}_4$  values in the methanogenic zone were consistently lower than -60 ‰ which is characteristic for hydrogenotrophic methanogenesis (Whiticar, 1999). This fits well to findings of Bednařík et al. (2019) and Mach et al. (2015) who found that hydrogenotrophic methanogenesis was the dominant CH<sub>4</sub> production pathway in the HZ of the Elbe and Sitka rivers.

420





At all sampling sites CH<sub>4</sub> concentrations decreased towards the sediment surface, but in most of the profiles, where  $\delta^{13}\text{C-CH}_4$  data was available, this was not accompanied by a significant enrichment in the heavier <sup>13</sup>CH<sub>4</sub>. Diffusive processes in these cases appear to be responsible for reducing CH<sub>4</sub> concentrations between the methanogenic zone and the upper part of the riverbed. At the sediment-water interface only very low CH<sub>4</sub> concentrations were found in all profiles (A-E), pointing towards small diffusive fluxes across the sediment-water interface. This finding is surprising, because we expected high CH<sub>4</sub> concentrations and large fluxes to the water column and towards the atmosphere. However, it must be noted that we looked at diffusive CH<sub>4</sub> fluxes within the HZ and did not cover the possible generation and transport of gas bubbles. Up to now, the contribution of these bubbles to total CH<sub>4</sub> fluxes across the sediment-water interface remains unknown, but ebullition might be a significant contributor to CH<sub>4</sub> effluxes from river Moosach.

As explained above, isotopic evidence indicated a significant contribution of microbial CH<sub>4</sub> consumption to a reduction of diffusive CH<sub>4</sub> fluxes only in profile C. In all other profiles, it is possible that CH<sub>4</sub> is either oxidized at rates too low to alter its isotopic composition or that CH<sub>4</sub> oxidation takes place close to the sediment-water interface where CH<sub>4</sub> concentrations were too low for the isotope measurements. In both cases, this implies a limited relevance for the reduction of diffusive CH<sub>4</sub> fluxes. To gain further insights into aerobic and anaerobic CH<sub>4</sub> oxidation, the modeling software PROFILE was applied (Sec. 3.4).

### 3.4 Inverse modeling of concentration gradients as a basis for discussing aerobic versus anaerobic oxidation of CH<sub>4</sub>

Figure 5 shows the results of inverse concentration gradient modeling with the software tool PROFILE. Overall, the modeled and measured concentrations agreed well to each other, especially for CH<sub>4</sub> and SO<sub>4</sub><sup>2-</sup>. Generally, production and consumption zones were located at changes in slope of concentration gradients. In the more complex CH<sub>4</sub> and SO<sub>4</sub><sup>2-</sup> profiles, often several consumption zones were detected. Deviations of modeled from measured data were more pronounced for O<sub>2</sub> gradients in profiles B and D, as well as for the NO<sub>3</sub><sup>-</sup> gradient in profile E. Here, the model could not capture the data well, potentially because higher concentration values and outliers in deeper sediment depths might have biased the fit in the upper gradient, resulting in broader oxygen reduction- and denitrification zones.

In the PROFILE software, vertical transport can be attributed to diffusion, bioturbation, and irrigation. However, exchange flows control river bed biogeochemistry and solute transport in the HZ (Bardini et al., 2012; 2013). As a result, the disregard of advective solute transport with hyporheic exchange flows may lead to an underestimation of O<sub>2</sub>, NO<sub>3</sub><sup>-</sup> and SO<sub>4</sub><sup>2-</sup> reduction rates since entering surface water increases the availability of educts for geochemical reactions. Where pore water movement is slow, O<sub>2</sub> uptake is proportional to the rate of solute influx (Rutherford et al., 1993; 1995). On the other hand, CH<sub>4</sub>-rich pore water is diluted with stream water and modeled CH<sub>4</sub> oxidation rates may, therefore, rather be over-estimated. Yet, hydraulic conductivities as calculated using the empirical formula of Beyer (1964) are relatively low ( $<8 \cdot 10^{-5} \text{ m s}^{-1}$ ) in the fine-grained deposits of the Moosach river (Table A4) which reduces the influence of the advective component in locations A, C and E. Further, the model is mainly used to delineate production and consumption zones rather than calculating exact reaction rates. Estimated production and consumption rates allow a comparison of different stream sites, but will deviate from reaction rates known from the literature and must be interpreted with care.

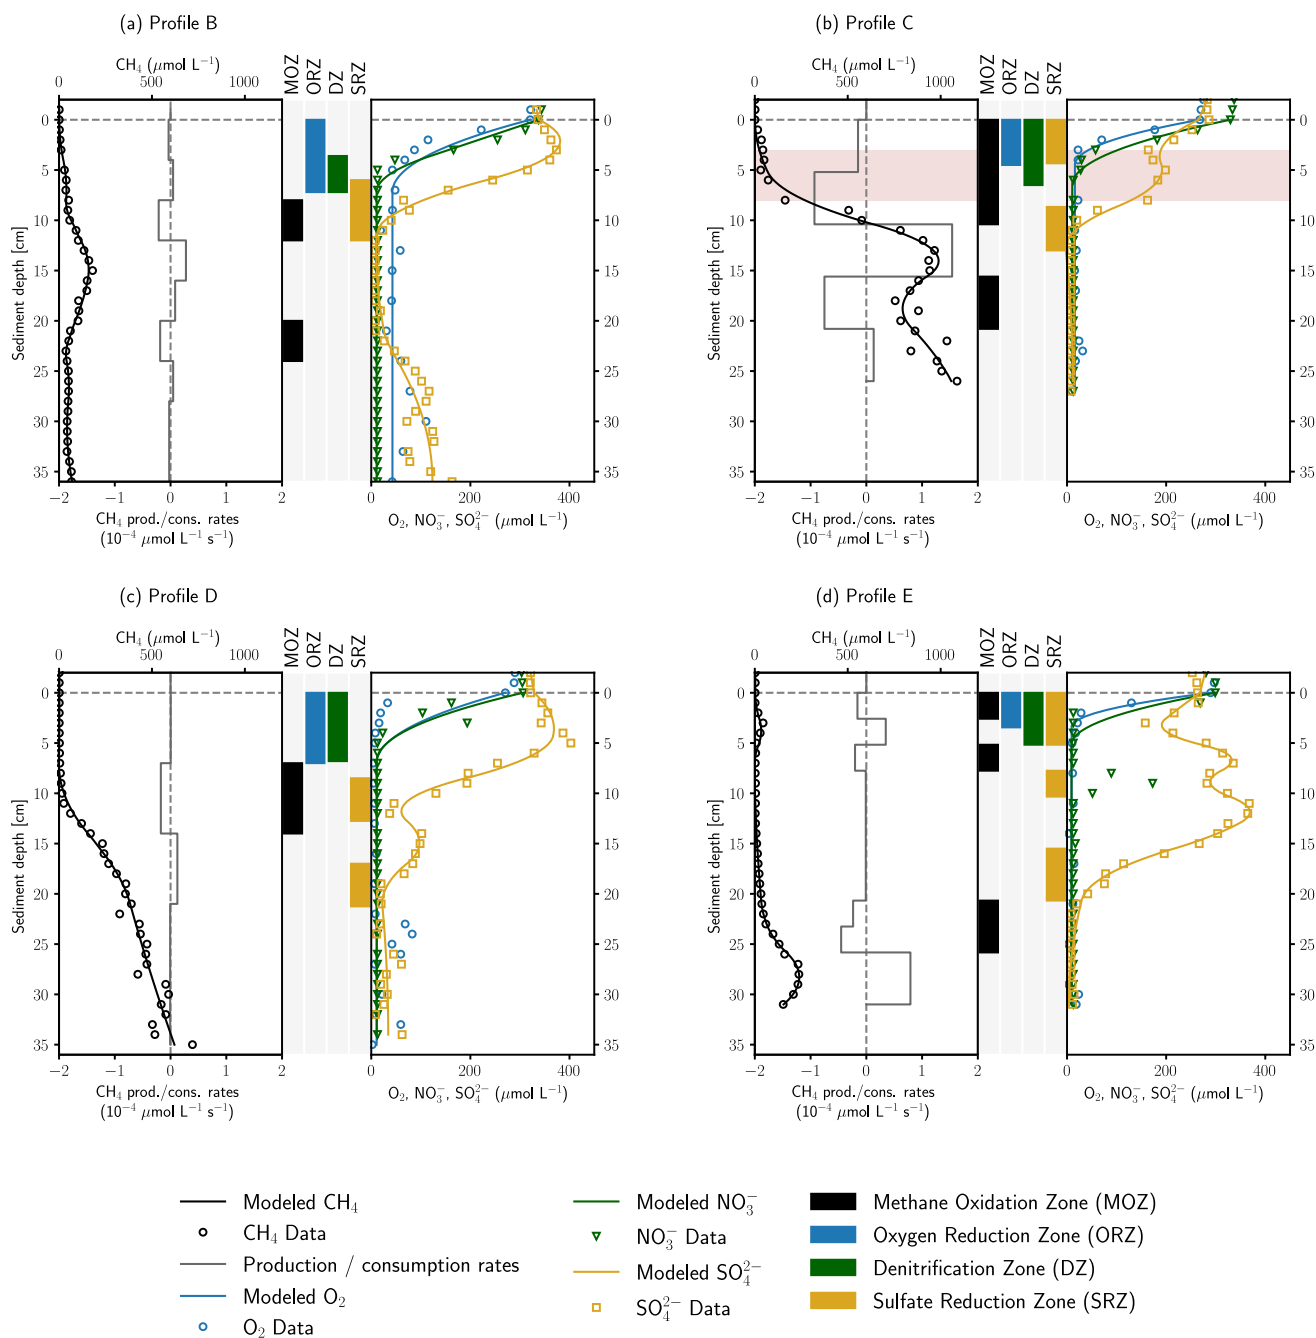

455

**Figure 5: Results of concentration gradient modeling using the PROFILE software for profiles B-E.** In each panel (a-d), the left side shows modeled and measured CH<sub>4</sub> concentrations as well as modeled CH<sub>4</sub> production and consumption rates. In the center, depth ranges of MOZ, ORZ, DZ and SRZ are highlighted. Zones with very low consumption rates (<5 · 10<sup>-6</sup> µmol L<sup>-1</sup> s<sup>-1</sup>) were not identified. On the right, measured and modeled O<sub>2</sub>, NO<sub>3</sub><sup>-</sup> and SO<sub>4</sub><sup>2-</sup> concentrations are shown. Rates are not displayed for electron acceptors for reasons of clarity. Red background color in panel (b) highlights an enrichment in δ<sup>13</sup>C-CH<sub>4</sub>.

460



Depth-integrated modeled  $O_2$  consumption rates were in the range 0.10-0.41  $mmol\ m^{-2}\ d^{-1}$ .  $NO_3^-$  reduction rates were found to be between 0.18 and 0.29  $mmol\ m^{-2}\ d^{-1}$  in profiles C, D and E while only 0.08  $mmol\ m^{-2}\ d^{-1}$  of  $NO_3^-$  were consumed in profile B in a much narrower DZ. Using PROFILE for the interpretation of concentration gradients in a microcosm study, Norði and Thamdrup (2014) found rates of 11.4  $mmol\ m^2\ d^{-1}$  for  $O_2$  and 0.9  $mmol\ m^2\ d^{-1}$  for  $NO_3^-$  uptake which is about 30-100 times higher for  $O_2$  and 3-12 times higher for  $NO_3^-$  than simulated here. In their work both  $O_2$  and  $NO_3^-$  were consumed completely within millimeters building much steeper gradients than observed in this study. Modeled ORZs in profiles C and E were 4.5 cm and 3.5 cm wide, in profiles B and D even 7 cm, in the latter two cases partly due to poor fits. Additionally, as mentioned above, an underestimation of modeled  $O_2$  and  $NO_3^-$  uptake rates is likely since the model does not include advective hyporheic exchange fluxes. In profile C, stream water can easily enter the sandy stream bed and flow velocities are expected to be higher than close to the banks,  $O_2$  uptake and denitrification are supposed to be much larger than suggested by the diffusive model. In profile B a single SRZ was found in 6-12 cm depth whereas  $SO_4^{2-}$  reduction takes place in several depth ranges in profiles C-E. Total modeled  $SO_4^{2-}$  consumption ranged from 0.06  $mmol\ m^{-2}\ d^{-1}$  (profile D) to 0.43  $mmol\ m^{-2}\ d^{-1}$  (profile E). This is in line with modeling results of Norði et al. (2013) who found 0.2  $mmol\ m^{-2}\ d^{-1}$  sulfate reduction in a freshwater lake sediment. Yet, directly measured rates were 10 times higher in their study showing a discrepancy between modeled and measured values. Jørgensen et al. (2001) found  $SO_4^{2-}$  reduction rates of 0.65-1.43  $mmol\ m^{-2}\ d^{-1}$  in the black sea using the same model. In profiles B and D SRZs were located beneath ORZ and DZ as it would be expected, but in profiles C and E the uppermost SRZ overlapped with ORZ and DZ. For profile C, the concurrent decrease of  $O_2$ ,  $NO_3^-$  and  $SO_4^{2-}$  has already been discussed in Sec. 3.1 (anaerobic micro-niches or dilution effects at a clogged sediment surface). For profile E,  $NO_3^-$  is completely consumed between 1-2 cm depth in a very narrow DZ and  $SO_4^{2-}$  concentrations start to decrease from 1 cm onwards, most likely right after  $NO_3^-$  has been removed from the system. The model did not capture these very steep gradients precisely, because data resolution was too coarse. Likewise, the sudden  $NO_3^-$  peak in 9 cm depth in profile E was not recognized, because too few data points in the peak were available.

MOZs were found in every profile even where  $\delta^{13}C-CH_4$  values were stable, but rates were generally low ( $<2 \cdot 10^{-4}\ \mu mol\ L^{-1}\ s^{-1}$ ). For example, in profiles B and E,  $CH_4$  was modeled to be consumed on both sides of the peaks in 3 cm and 15 cm depth, at rates of 0.06-0.07  $mmol\ m^{-2}\ d^{-1}$  and 0.04-0.05  $mmol\ m^{-2}\ d^{-1}$ , respectively. It is not surprising that these small consumption rates did not change the isotopic composition of  $CH_4$ . A single MOZ was found in profile D in 7-14 cm depth with a depth-integrated rate of 0.11  $mmol\ m^{-2}\ d^{-1}$ . In profile C, 0.42  $mmol\ CH_4\ m^{-2}\ d^{-1}$  were simulated to be oxidized between 0-10.4 cm depth, but with a 6 times higher rate below the ORZ (5.2-10.4 cm). This upper MOZ falls together with the observed enrichment in  $\delta^{13}C-CH_4$  between 3-8 cm depth.

The model was applied to help identifying the electron acceptors responsible for  $CH_4$  oxidation. This involves checking for overlaps between MOZ and ORZ, DZ and SRZ. In profiles A and D, the MOZ only overlaps the SRZ combined with very low modeled oxidation rates. Profiles C and E show overlaps of all zones in the uppermost centimeters where  $\delta^{13}C-CH_4$  measurements were not available due to low  $CH_4$  concentrations. Here, aerobic methane oxidation could potentially take place.



495 In profile C, the modeled oxidation rate increased significantly below the ORZ and intersected with the DZ in the upper and  
the SRZ in the lowest part. This could point towards AOM coupled to denitrification or bacterial sulfate reduction in anoxic  
micro-niches, but since gradients were very steep and trace oxygen might also have been present, the delineation of the relevant  
electron acceptor is not possible. The higher CH<sub>4</sub> oxidation rate in the presence of NO<sub>3</sub><sup>-</sup> compared to O<sub>2</sub> in profile C, if valid,  
may show a situation in the HZ of the Moosach river similar to sediments of lake Constance. Measurements of Deutzmann et  
500 al. (2014) showed that N-DAMO was the major CH<sub>4</sub> sink although the community of aerobic methanotrophs would have been  
capable of oxidizing the entire methane flux. Limiting for aerobic oxidation was the available CH<sub>4</sub> after passing through the  
denitrification zone where most of it was already oxidized. Nonetheless, it is also possible that aerobic methane oxidation has  
a greater influence than suggested by the model. Either way, both aerobic and anaerobic CH<sub>4</sub> oxidation have the potential to  
reduce GHG emissions at location C.

505 Both profiles C and E have an additional MOZ deeper down where all electron acceptors were already consumed. In profile C  
it looks like the slope changes in the lower part of the profile are due to an overfitting of the model to fluctuating concentrations  
within the methanogenic zone. In profile D however, the deepest MOZ is located where CH<sub>4</sub> oxidation would be expected,  
because of a clear slope change of the CH<sub>4</sub> concentration gradient. Potential electron acceptors could be SO<sub>4</sub><sup>2-</sup>, which is present  
only few centimeters above, Fe- or Mn-oxides or perhaps trace amounts of O<sub>2</sub>.

### 510 3.5 Microbial communities at location C

The relative abundance of 16S rRNA gene sequences with similarity to known methanogenic microbial groups increased with  
sediment depth into the methane zone (Fig. 6a). In the shallower depths (0-4 cm) the methanogenic microbial community was  
dominated by the Methanomasiliococcales and Methanofastidiosales, whereas at the bottom of the profile (16-21 cm)  
Methanomethyliales and Methanomasiliococcales dominated the methanogenic microbial community (Fig. 6b). The  
515 Methanomasiliococcales have been linked to CH<sub>4</sub> production from methanol in freshwater wetland environments (Narrowe et  
al., 2019) and therefore, their high relative abundance here might be linked to this production pathway in the HZ. Carbon  
fractionation factors related to CH<sub>4</sub> production from methanol ( $\epsilon_C = 68-77$ ) are similar to those of hydrogenotrophic  
methanogenesis ( $\epsilon_C = 55-58$ ) and much higher than for acetoclastic methanogenesis ( $\epsilon_C = 24-27$ ) or CH<sub>4</sub> production from other  
methylated compounds (Whiticar, 1999). Thus, the strong depletion in  $\delta^{13}\text{C-CH}_4$  we measured in the methanogenic zone  
520 supports the potential for CH<sub>4</sub> production from methanol. The Methanomethyliales are a newly discovered group of  
methanogenic archaea branching within the Verstraetearchaeota that exhibit metabolic pathways in the genome indicative of  
H<sub>2</sub>-dependent methylotrophic methanogenesis (Berghuis et al., 2019; Vanwonterghem et al., 2016). The increased relative  
abundance of the Methanomethyliales in our sediment-core within the methane zone is a first clear evidence that these novel  
methanogenic archaea could be important for CH<sub>4</sub> production in the HZ.

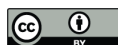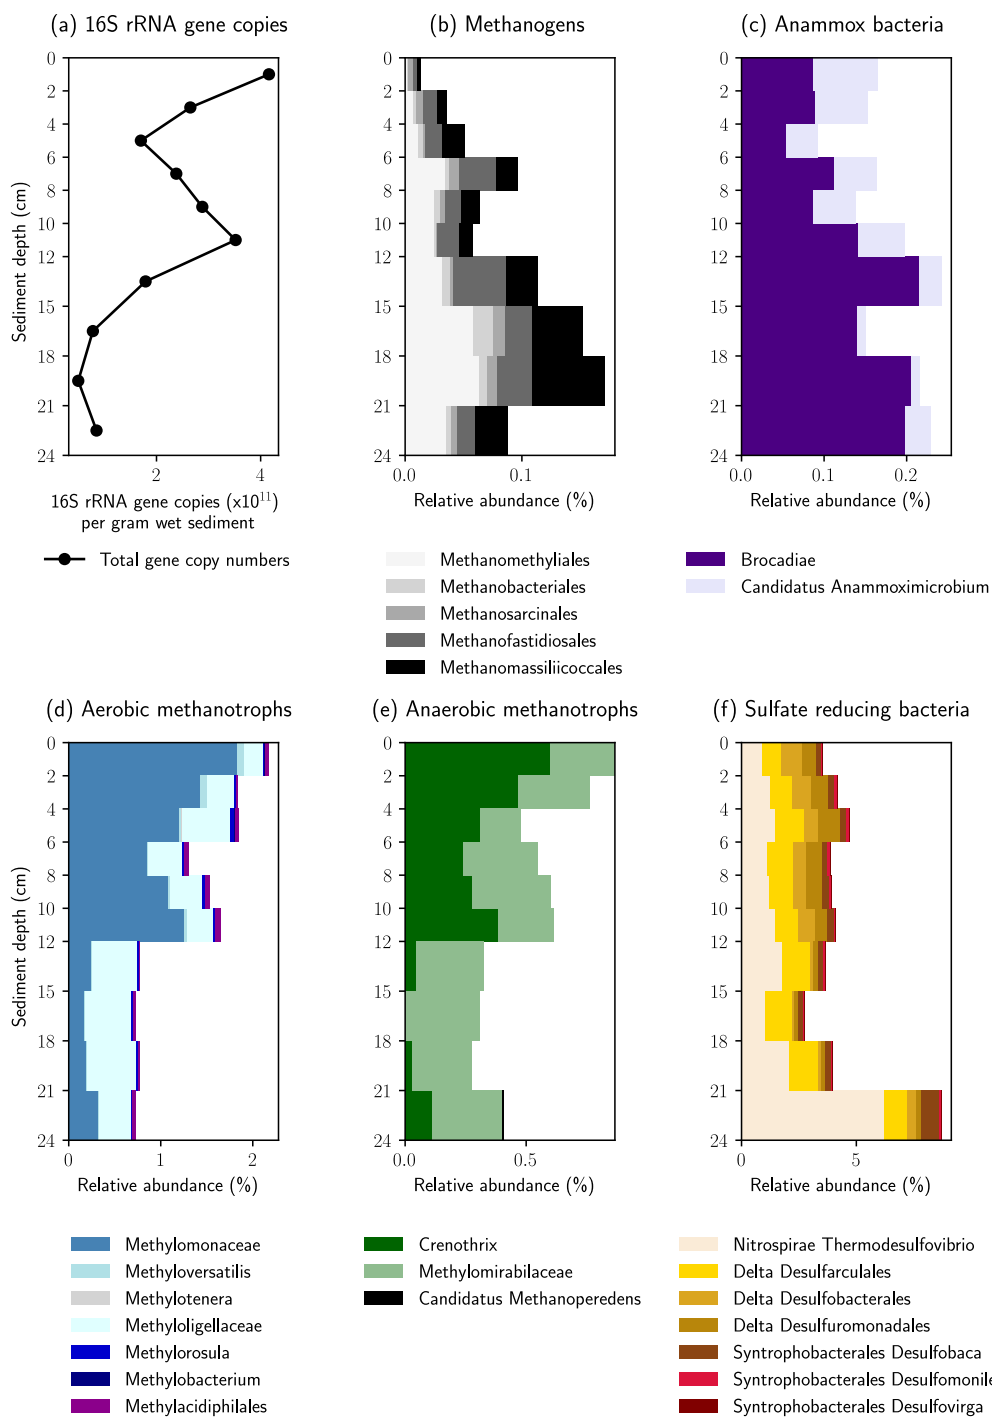

525

**Figure 6: Relative abundance of key microbial groups detected in the 16S rRNA gene sequencing datasets.** The histograms display the relative abundance (% of total reads) assigned to each group displayed. Note the increase in relative abundance of methanogenic groups below 12 cm, whereas the relative abundance of methane oxidizing groups increases above 12 cm.



530 Above the methane zone, there is an increased relative abundance of both aerobic and anaerobic CH<sub>4</sub> oxidizing microbial groups (Fig. 6d and e). The aerobic groups affiliated with Methylomonaceae (Gammaproteobacteria) and Methyloligellaceae (Alphaproteobacteria) dominated at depths above 12 cm (Fig. 6d), and are known to be involved in aerobic CH<sub>4</sub> oxidation (Takeuchi et al., 2019).

The anaerobic methanotrophs had closest affiliation to *Methylomirabiliceae* and *Crenothrix*. Both are involved in different steps of coupling CH<sub>4</sub> oxidation to the reduction of NO<sub>3</sub><sup>-</sup> and NO<sub>2</sub><sup>-</sup> (Oswald et al., 2017; Ettwig et al., 2010). The results 535 indicate that that anaerobic and aerobic CH<sub>4</sub> oxidizers can somehow inhabit the same sediment depths in the HZ, a finding that has been observed in paddy soil previously (Vaksmas et al., 2017). *Crenothrix* are known to be facultative anaerobes, which can explain their presence in oxic environments, but O<sub>2</sub> was shown to have a detrimental effect on members of the *Methylomirabiliceae* like *Candidatus Methylomirabilis oxyfera* (Luesken et al., 2012). Their high abundance in the uppermost centimeters of the sediment is, therefore, surprising. Yet, the close proximity and co-existence of aerobic and anaerobic CH<sub>4</sub> 540 oxidizers fits well to the observed steep and partly overlapping gradients. The mixed distribution of strict anaerobes together with aerobes and facultative aerobes within the HZ could be due to relatively high levels of mixing and turbidity at the stream bottom, which resuspends and distributes sediments to different zones.

The presence of 16S rRNA gene sequences affiliated with the bacterial groups Brocadia and ‘*Candidatus Anammoximicrobium*’ that are known to perform anaerobic oxidation of ammonium (Anammox) (Wu et al., 2020), may show 545 that Anammox via nitrite reduction was also ongoing. Because the Anammox bacteria overlapped with anaerobic CH<sub>4</sub> oxidizing bacteria (*Methylomirabiliceae* and *Crenothrix*) in the vertical profile, our results might show that, similar to anoxic lake bottom water (Einsiedl et al., 2020), a coupling of Anammox with NO<sub>2</sub><sup>-</sup> dependent CH<sub>4</sub> oxidation (N-DAMO) is possible in the anoxic sediments of the HZ. This may represent a mechanism whereby N<sub>2</sub> is released, and nitrogen is eliminated from the HZ. Based on the low abundance of ANME archaea we postulate that S-DAMO is unlikely to be a relevant process within 550 the HZ of Moosach river. This is also in line with earlier findings by Shen et al. (2019) who found that NO<sub>3</sub><sup>-</sup> and NO<sub>2</sub><sup>-</sup> could trigger AOM in all sandy river sediments in their study, while SO<sub>4</sub><sup>2-</sup> and Fe were only effective in a few examples.

## 5 Conclusions

Measurements and interpretation of geochemical profiles and stable isotopes (δ<sup>13</sup>C-CH<sub>4</sub>) at five different sampling sites in the river Moosach showed a predominant source of dissolved CH<sub>4</sub> and a potential for AOM. Based on our field study we can 555 confirm previous findings that large quantities of CH<sub>4</sub> are produced in river sediments, which can contribute to global warming. CH<sub>4</sub> was produced in all sampled locations, but CH<sub>4</sub> concentrations varied drastically between profiles. Much more CH<sub>4</sub> was produced in summer, especially in areas with fine, organic rich sediments like inside bends of curved river sections. These findings suggest that main influencing factors for CH<sub>4</sub> production in the HZ are temperature, organic carbon content and sediment composition. Based on measured δ<sup>13</sup>C values and the microbial community found in location C, we consider 560 hydrogenotrophic and H<sub>2</sub>-dependent methylotrophic methanogenesis as relevant CH<sub>4</sub> production pathways. CH<sub>4</sub>



565 concentrations at the sediment surface have been found to be low and  $\delta^{13}\text{C}-\text{CH}_4$  values were almost constant over the sampled sediment depth in most of the measured profiles, indicating a diffusion-limited transport of this GHG towards and across the sediment-water interface. However, in one of the profiles, an isotopic shift in  $\delta^{13}\text{C}-\text{CH}_4$  to less negative values linked with decreasing  $\text{CH}_4$  concentrations implied biological methane oxidation. Both microbiological and modeling methods showed the potential for anaerobic methane oxidation coupled with denitrification (N-DAMO). Yet, chemical gradients were very steep so that aerobic and anaerobic redox zones were in too close proximity to find a clear evidence for N-DAMO within the HZ of river Moosach. Nevertheless, our results clearly show the removal of nitrogen and decreasing  $\text{CH}_4$  concentrations towards the sediment-water interface. Both processes are crucial in improving the quality of river water and in reducing GHG emissions to the atmosphere.

570



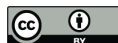

## Appendix A: Surface water chemistry, sampling details and sediment characteristics

Table A1 shows the surface water chemistry of the Moosach river. The water is of calcium-magnesium-bicarbonate type with elevated chloride concentrations.

575 **Table A1: Surface water chemistry. Concentrations represent mean values of data recorded between 2010-2018. Data retrieved from the Bavarian State Office of the Environment.**

| Component                     | Concentration (mg L <sup>-1</sup> ) |
|-------------------------------|-------------------------------------|
| Na <sup>+</sup>               | 30.9                                |
| Ca <sup>2+</sup>              | 100                                 |
| Mg <sup>2+</sup>              | 20.7                                |
| Cl <sup>-</sup>               | 54                                  |
| NO <sub>3</sub> <sup>-</sup>  | 20.4                                |
| SO <sub>4</sub> <sup>2-</sup> | 30.4                                |
| HCO <sub>3</sub> <sup>-</sup> | 340                                 |
| Dissolved O <sub>2</sub>      | 8.7                                 |
| TOC                           | 3.5                                 |
| DOC                           | 2.8                                 |

Table A2 summarizes information on sampling intervals and measured basic chemical parameters of the surface water as measured on the days of sampling. Further, average discharge and temperature during equilibration period are given.

580 **Table A2: Background information on the five sampling periods, basic chemical parameters of the surface water on the days of sampling and mean discharge and surface water temperature during the sampling period.**

| Profile | Placement  | Sampling   | Days | Basic chemical parameters of the surface water on the days of sampling |                                      |     |                                     | Mean discharge & temperature during equilibration* |                      |
|---------|------------|------------|------|------------------------------------------------------------------------|--------------------------------------|-----|-------------------------------------|----------------------------------------------------|----------------------|
|         |            |            |      | T <sub>sw</sub> (° C)                                                  | O <sub>2</sub> (mg L <sup>-1</sup> ) | pH  | Conductivity (µS cm <sup>-1</sup> ) | Q <sub>M</sub> (m <sup>3</sup> s <sup>-1</sup> )   | T <sub>M</sub> (° C) |
| A       | 02.03.2021 | 22.03.2021 | 36   | 7.0                                                                    | no measurements                      |     |                                     | 2.33                                               | 7.5                  |
| B       | 04.05.2021 | 26.05.2021 | 22   | 11.3                                                                   | 9.9                                  | 7.9 | 819                                 | 2.51                                               | 12.0                 |
| C       | 16.06.2021 | 06.07.2021 | 20   | 15.3                                                                   | 10.5                                 | 8.1 | 806                                 | 2.93                                               | 16.6                 |
| D       | 15.07.2020 | 20.08.2020 | 20   | 16.2                                                                   | 10.2                                 | 7.6 | 756                                 | 1.46                                               | 17.1                 |
| E       | 21.07.2021 | 18.08.2021 | 28   | 14.5                                                                   | 10.9                                 | 8.1 | 797                                 | 2.48                                               | 15.8                 |

\*Data retrieved from the Bavarian State Office of the Environment.



585 Sediment cores were taken at each sampling site by manually pushing a coring tube (inner diameter 42 mm) into the sediment. In the laboratory, each core was divided into homogeneous layers. Sieve-slurry analyses were performed to obtain sediment grain size distributions according to DIN EN ISO 17892-4. Sedimentation experiments failed for location B (11-22 cm) due to the high content of organic matter which induced coagulation at an unexpectedly high rate. Sedimentation experiments were not performed for location E 0-7 cm. The grain size distribution curves for each sampling site are displayed in Fig. A1 and  
 590 characteristic values listed in Tab. A2.

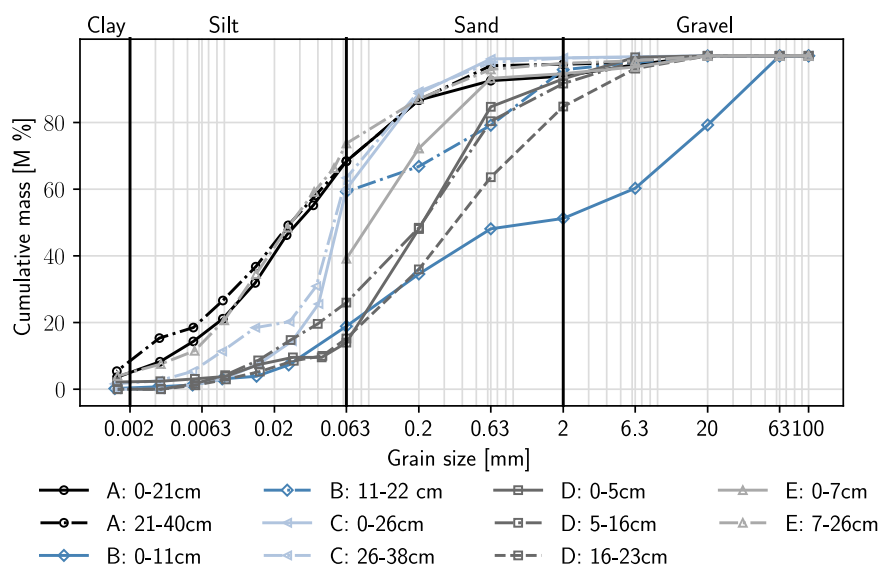

**Figure A1: Grain size distribution curves**

Porosity  $\phi$  was calculated as a function of the median grain diameter  $d_{50}$  as suggested by Wu and Wang (2006) who modified  
 595 the formula for initial porosity of sediment deposits (less than one year after deposition) proposed by Komura and Colby (1963). Values for  $d_{50}$  and  $\phi$  are also given in Tab. A2. For location B (11-22 cm), the given  $d_{50}$  is an estimation based exclusively on the sieving analysis.

$$\phi = 0.13 + \frac{0.21}{(d_{50} + 0.002)^{0.21}} \quad (\text{A1})$$

600



605 **Table A3: Sediment characteristics and calculated porosity  $\phi$**

| Profile | Sampling date | Depth (cm) | Silt/Clay (%) | Sand (%) | Gravel (%) | $d_{50}$ (mm) | $\phi$ |
|---------|---------------|------------|---------------|----------|------------|---------------|--------|
| A       | 22.03.2021    | 0-21       | 65            | 29       | 6          | 0.030         | 0.56   |
|         |               | 21-40      | 68            | 29       | 3          | 0.026         | 0.57   |
| B       | 26.05.2021    | 0-11       | 19            | 32       | 49         | 1.46          | 0.32   |
|         |               | 11-22      | 59            | 37       | 4          | 0.040         | 0.54   |
| C       | 06.07.2021    | 0-26       | 60            | 39       | 1          | 0.030         | 0.51   |
|         |               | 26-38      | 63            | 36       | 1          | 0.019         | 0.51   |
| D       | 20.08.2020    | 0-5        | 14            | 79       | 7          | 0.22          | 0.42   |
|         |               | 5-16       | 26            | 66       | 8          | 0.22          | 0.42   |
|         |               | 16-23      | 15            | 70       | 15         | 0.42          | 0.38   |
| E       | 18.08.2021    | 0-7        | 39            | 56       | 5          | 0.11          | 0.46   |
|         |               | 7-26       | 74            | 24       | 2          | 0.027         | 0.57   |

Hydraulic conductivity  $K$  was roughly estimated using the formula introduced by Beyer (1964) (Eq. A2).

$$K = \beta \frac{g}{\nu} \log \left( \frac{500}{C_U} \right) d_{10}^2 \quad (\text{A2})$$

with the coefficient  $\beta = 1.30 \cdot 10^{-5}$  as recommended by Rosas et al. (2014) for river sediments, the gravitational constant  $g = 9.81 \text{ m s}^{-2}$ , the kinematic viscosity  $\nu = 1.307 \text{ mm}^2 \text{ s}^{-1}$  for  $10^\circ \text{C}$  (Kestin et al., 1978), the uniformity coefficient  $C_U = d_{60}/d_{10}$  and the grain diameters  $d_{10}$  and  $d_{60}$  at 10 % and 60 % of the cumulative grain size distribution curve, respectively. For location B (11-22 cm) and location E (0-7 cm) the  $d_{10}$  was estimated only based on the sieving analysis.

**Table A4: Hydraulic conductivities estimated using the Beyer equation.**

| Profile | Sampling date | Depth (cm) | $d_{10}$ (mm) | $d_{60}$ (mm) | $C_U$ | $K$ ( $\text{m s}^{-1}$ ) |
|---------|---------------|------------|---------------|---------------|-------|---------------------------|
| A       | 22.03.2021    | 0-21       | 0.0039        | 0.047         | 12.0  | $2.4 \cdot 10^{-6}$       |
|         |               | 21-40      | 0.0023        | 0.043         | 18.7  | $7.4 \cdot 10^{-7}$       |
| B       | 26.05.2021    | 0-11       | 0.041         | 6.2           | 150.5 | $8.6 \cdot 10^{-5}$       |
|         |               | 11-22      | 0.010         | 0.076         | 7.6   | $1.8 \cdot 10^{-5}$       |
| C       | 06.07.2021    | 0-26       | 0.0019        | 0.063         | 33.2  | $4.1 \cdot 10^{-7}$       |
|         |               | 26-38      | 0.008         | 0.062         | 7.8   | $1.1 \cdot 10^{-5}$       |
| D       | 20.08.2020    | 0-5        | 0.048         | 0.34          | 7.1   | $4.2 \cdot 10^{-4}$       |
|         |               | 5-16       | 0.018         | 0.36          | 20.0  | $4.4 \cdot 10^{-5}$       |
|         |               | 16-23      | 0.043         | 0.57          | 13.3  | $2.8 \cdot 10^{-4}$       |
| E       | 18.08.2021    | 0-7        | 0.020         | 0.15          | 7.5   | $7.1 \cdot 10^{-5}$       |
|         |               | 7-26       | 0.0047        | 0.039         | 8.3   | $3.8 \cdot 10^{-6}$       |



615

## Appendix B: Determination of a cut-off threshold concentration for isotope measurements

Measurements of  $\delta^{13}\text{C}\text{-CH}_4$  at low headspace  $\text{CH}_4$  concentrations in the sample vials showed large standard deviations between repeated measurements. Thus, an experiment was conducted to find an appropriate cut-off value above which reliable isotopic data could be obtained. Two standards with  $-21.1\text{‰}$  and  $-69.0\text{‰}$  were diluted to obtain different concentrations and measured repeatedly. A cut-off value of 30 ppm was chosen based on the results displayed in Fig. B1.

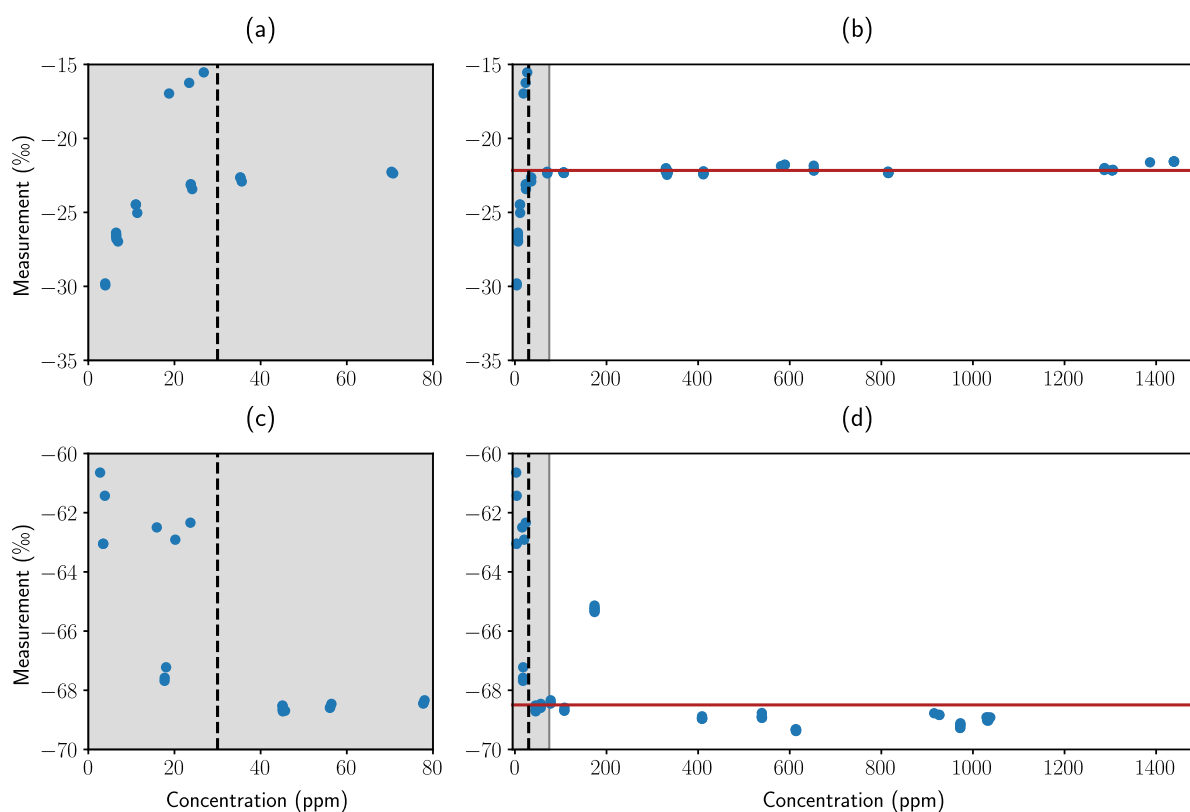

**Figure B1: Repeated measurements of standards with  $\delta^{13}\text{C}\text{-CH}_4$  values of  $-21.1\text{‰}$  (panels (a) and (b)) and  $-69.0\text{‰}$  (panels (c) and (d)). The red line in panels (b) and (d) represents the average value of all measurements above the cut-off threshold.**

625

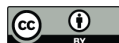

### Appendix C: Calculation of sediment diffusion coefficients

Diffusion coefficients were calculated based on Boudreau (1997). Equations C1 and C2 have been used for the diffusion coefficients in water  $D^0$  of gases and ions, respectively. The mean surface water temperature during the equilibration period of the peeper  $T_M$  (Tab. A2) was used for temperatures in Eq. C1 and C2.

$$D^0 = 4.72 \cdot 10^{-9} \frac{T}{\mu V_b^{0.6}} \quad (C1)$$

where  $\mu$  is the dynamic viscosity of water in units of poise,  $T$  the absolute temperature [°K] and  $V_b$  the molar volume of the solute. Values for  $V_b$  are given in Tab. C1.

635 **Table C1: Parameters for the calculation of  $D^0$  in for relevant gases**

| Species         | $V_b$ |
|-----------------|-------|
| O <sub>2</sub>  | 27.9  |
| CH <sub>4</sub> | 37.7  |

$$D^0 = (m_0 + m_1 t) \cdot 10^{-6} \quad (C2)$$

where  $m_0$  and  $m_1$  are parameters listed in Tab. C2 and  $t$  is temperature in [°C].

640 **Table C2: Parameters for the calculation of  $D^0$  for relevant ions**

| Ion                           | $m_0$ | $m_1$ |
|-------------------------------|-------|-------|
| NO <sub>3</sub> <sup>-</sup>  | 9.50  | 0.388 |
| SO <sub>4</sub> <sup>2-</sup> | 4.88  | 0.232 |

Table C3 shows diffusion coefficient for the different solutes and sampling dates in water and Tab. C4 the calculated sediment diffusion coefficients based on the Eq. C3 (Iversen and Jørgensen, 1993).

$$D_s = \frac{D^0}{1+3(1-\varphi)} \quad (C3)$$

645

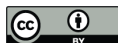

650 **Table C3: Calculated values for  $D^0$  for mean surface water temperature during the sampling period  $T_M$**

| Profile | Sampling date | $T_M$ (°C) | $D^0_{CH_4}$<br>( $\times 10^{-5} \text{ cm}^2 \text{ s}^{-1}$ ) | $D^0_{O_2}$<br>( $\times 10^{-5} \text{ cm}^2 \text{ s}^{-1}$ ) | $D^0_{NO_3}$<br>( $\times 10^{-5} \text{ cm}^2 \text{ s}^{-1}$ ) | $D^0_{SO_4}$<br>( $\times 10^{-6} \text{ cm}^2 \text{ s}^{-1}$ ) |
|---------|---------------|------------|------------------------------------------------------------------|-----------------------------------------------------------------|------------------------------------------------------------------|------------------------------------------------------------------|
| A       | 22.03.2021    | 7.4        | 1.04                                                             | 1.25                                                            | 1.22                                                             | 6.50                                                             |
| B       | 26.05.2021    | 11.3       | 1.20                                                             | 1.44                                                            | 1.39                                                             | 7.50                                                             |
| C       | 06.07.2021    | 15.3       | 1.36                                                             | 1.63                                                            | 1.54                                                             | 8.43                                                             |
| D       | 20.08.2020    | 16.2       | 1.40                                                             | 1.67                                                            | 1.58                                                             | 8.64                                                             |
| E       | 18.08.2021    | 14.5       | 1.33                                                             | 1.59                                                            | 1.51                                                             | 8.24                                                             |

**Table C4: Calculated values for  $D_s$  for sampling days and sedimentary layers**

| Profile | Sampling date | Sediment depth (cm) | $\phi$ | $D_{s,CH_4}$<br>( $\times 10^{-6} \text{ cm}^2 \text{ s}^{-1}$ ) | $D_{s,O_2}$<br>( $\times 10^{-6} \text{ cm}^2 \text{ s}^{-1}$ ) | $D_{s,NO_3}$<br>( $\times 10^{-6} \text{ cm}^2 \text{ s}^{-1}$ ) | $D_{s,SO_4}$<br>( $\times 10^{-6} \text{ cm}^2 \text{ s}^{-1}$ ) |
|---------|---------------|---------------------|--------|------------------------------------------------------------------|-----------------------------------------------------------------|------------------------------------------------------------------|------------------------------------------------------------------|
| A       | 22.03.2021    | 0-21                | 0.56   | 4.50                                                             | 5.39                                                            | 5.27                                                             | 2.80                                                             |
|         |               | 21-40               | 0.57   | 4.56                                                             | 5.46                                                            | 5.33                                                             | 2.84                                                             |
| B       | 26.05.2021    | 0-11                | 0.32   | 3.99                                                             | 4.75                                                            | 4.57                                                             | 2.47                                                             |
|         |               | 11-22               | 0.54   | 5.09                                                             | 6.06                                                            | 5.83                                                             | 3.15                                                             |
| C       | 06.07.2021    | 0-26                | 0.51   | 5.53                                                             | 6.62                                                            | 6.25                                                             | 3.41                                                             |
| D       | 20.08.2020    | 0-16                | 0.42   | 5.10                                                             | 6.12                                                            | 5.76                                                             | 3.15                                                             |
|         |               | 16-23               | 0.38   | 4.89                                                             | 5.86                                                            | 5.52                                                             | 3.02                                                             |
| E       | 18.08.2021    | 0-7                 | 0.46   | 5.08                                                             | 6.09                                                            | 5.77                                                             | 3.15                                                             |
|         |               | 7-26                | 0.57   | 5.81                                                             | 6.97                                                            | 6.61                                                             | 3.60                                                             |

655



### Author contributions

660 TM, AW and FE conceptualized the project. TM and AW developed the methodology and performed field works. ÖC and WO contributed the microbiological investigations. TM was responsible for visualization and original draft preparation. Funding acquisition and supervision were performed by FE and TB. TM, AW, WO, TB and FE all participated in writing, review and editing.

### Competing interests

The authors declare that they have no competing interests.

### Acknowledgements

665 We thank Tobias Lanzl for support during the field campaign as well as Susanne Thiemann and Jaroslava Obel for their help with analytics in the laboratory. We also want to thank Dr. Friedhelm Pfeiffer for critical reading and reviewing. Further, we want to acknowledge the good cooperation with the team of the Chair of Systems Biology (TUM).

### References

- 670 Arshad, A., Speth, D. R., de Graaf, R. M., Op den Camp, H. J., Jetten, M. S., and Welte, C. U.: A metagenomics-based metabolic model of nitrate-dependent anaerobic oxidation of methane by Methanoperedens-like archaea, *Front Microbiol*, 6, 1423, 2015.
- Auerswald, K. and Geist, J.: Extent and causes of siltation in a headwater stream bed: catchment soil erosion is less important than internal stream processes, *Land Degradation & Development*, 29, 737-748, 2018.
- Bange, H. W., Sim, C. H., Bastian, D., Kallert, J., Kock, A., Mujahid, A., and Müller, M.: Nitrous oxide (N<sub>2</sub>O) and methane (CH<sub>4</sub>) in rivers and estuaries of northwestern Borneo, *Biogeosciences*, 16, 4321-4335, 2019.
- 675 Bardini, L., Boano, F., Cardenas, M., Revelli, R., and Ridolfi, L.: Nutrient cycling in bedform induced hyporheic zones, *Geochimica et Cosmochimica Acta*, 84, 47-61, 2012.
- Bardini, L., Boano, F., Cardenas, M., Sawyer, A., Revelli, R., and Ridolfi, L.: Small-scale permeability heterogeneity has negligible effects on nutrient cycling in streambeds, *Geophys Res Lett*, 40, 1118-1122, 2013.
- Bavarian State Office of the Environment. Gewässerkundlicher Dienst Bayern: <https://www.gkd.bayern.de/en/>, last access: 19.01.2022.
- 680 Beal, E. J., House, C. H., and Orphan, V. J.: Manganese- and iron-dependent marine methane oxidation, *Science*, 325, 184-187, 2009.
- Bednařík, A., Blaser, M., Matoušů, A., Tušer, M., Chaudhary, P. P., Šimek, K., and Rulík, M.: Sediment methane dynamics along the Elbe River, *Limnologia*, 79, 125716, 2019.





- 685 Berg, P., Risgaard-Petersen, N., and Rysgaard, S.: Interpretation of measured concentration profiles in sediment pore water, *Limnol Oceanogr*, 43, 1500-1510, 1998.
- Berghuis, B. A., Yu, F. B., Schulz, F., Blainey, P. C., Woyke, T., and Quake, S. R.: Hydrogenotrophic methanogenesis in archaeal phylum Verstraetearchaeota reveals the shared ancestry of all methanogens, *Proceedings of the National Academy of Sciences*, 116, 5037-5044, 2019.
- 690 Beyer, W.: Zur bestimmung der wasserdurchlässigkeit von kiesen und sanden aus der kornverteilungskurve, *WWT*, 14, 165-168, 1964.
- Boano, F., Harvey, J. W., Marion, A., Packman, A. I., Revelli, R., Ridolfi, L., and Wörman, A.: Hyporheic flow and transport processes: Mechanisms, models, and biogeochemical implications, *Reviews of Geophysics*, 52, 603-679, 2014.
- Bodmer, P., Wilkinson, J., and Lorke, A.: Sediment properties drive spatial variability of potential methane production and oxidation in small streams, *Journal of Geophysical Research: Biogeosciences*, 125, e2019JG005213, 2020.
- 695 Boetius, A., Ravensschlag, K., Schubert, C. J., Rickert, D., Widdel, F., Gieseke, A., Amann, R., Jørgensen, B. B., Witte, U., and Pfannkuche, O.: A marine microbial consortium apparently mediating anaerobic oxidation of methane, *Nature*, 407, 623-626, 2000.
- Borges, A. V., Darchambeau, F., Teodoru, C. R., Marwick, T. R., Tamoo, F., Geeraert, N., Omengo, F. O., Guérin, F., Lambert, T., and Morana, C.: Globally significant greenhouse-gas emissions from African inland waters, *Nature Geoscience*, 8, 637-642, 2015.
- 700 Boudreau, B. P.: *Diagenetic models and their implementation*, Springer, Berlin 1997.
- Braun, A., Auerswald, K., and Geist, J.: Drivers and spatio-temporal extent of hyporheic patch variation: implications for sampling, 2012.
- 705 Campeau, A. and Del Giorgio, P. A.: Patterns in CH<sub>4</sub> and CO<sub>2</sub> concentrations across boreal rivers: Major drivers and implications for fluvial greenhouse emissions under climate change scenarios, *Global change biology*, 20, 1075-1088, 2014.
- Canfield, D. E. and Thamdrup, B.: Towards a consistent classification scheme for geochemical environments, or, why we wish the term 'suboxic' would go away, *Geobiology*, 7, 385-392, 2009.
- Capone, D. G. and Kiene, R. P.: Comparison of microbial dynamics in marine and freshwater sediments: Contrasts in anaerobic carbon catabolism 1, *Limnol Oceanogr*, 33, 725-749, 1988.
- 710 Casagrande, D. J., Siefert, K., Berschinski, C., and Sutton, N.: Sulfur in peat-forming systems of the Okefenokee Swamp and Florida Everglades: origins of sulfur in coal, *Geochimica et Cosmochimica Acta*, 41, 161-167, 1977.
- Comer-Warner, S. A., Romeijn, P., Goody, D. C., Ullah, S., Kettridge, N., Marchant, B., Hannah, D. M., and Krause, S.: Thermal sensitivity of CO<sub>2</sub> and CH<sub>4</sub> emissions varies with streambed sediment properties, *Nat Commun*, 9, 1-9, 2018.
- 715 Conrad, R.: Quantification of methanogenic pathways using stable carbon isotopic signatures: a review and a proposal, *Org Geochem*, 36, 739-752, 2005.
- Coskun, Ö. K., Özen, V., Wankel, S. D., and Orsi, W. D.: Quantifying population-specific growth in benthic bacterial communities under low oxygen using H<sub>2</sub><sup>18</sup>O, *The ISME journal*, 13, 1546-1559, 2019.



- 720 Crawford, J. T., Loken, L. C., West, W. E., Crary, B., Spawn, S. A., Gubbins, N., Jones, S. E., Striegl, R. G., and Stanley, E. H.: Spatial heterogeneity of within-stream methane concentrations, *Journal of Geophysical Research: Biogeosciences*, 122, 1036-1048, 2017.
- Cui, M., Ma, A., Qi, H., Zhuang, X., and Zhuang, G.: Anaerobic oxidation of methane: an “active” microbial process, *MicrobiologyOpen*, 4, 1-11, 2015.
- 725 Dedysh, S. N. and Knief, C.: Diversity and phylogeny of described aerobic methanotrophs, in: *Methane biocatalysis: paving the way to sustainability*, Springer, 17-42, 2018.
- Deppenmeier, U.: The unique biochemistry of methanogenesis, *Progress in Nucleic Acid Research and Molecular Biology*, 71, 223-283, 2002.
- 730 Deutzmann, J. S.: Anaerobic methane oxidation in freshwater environments, *Anaerobic Utilization of Hydrocarbons, Oils, and Lipids*, 391-404, 2020.
- Deutzmann, J. S., Stief, P., Brandes, J., and Schink, B.: Anaerobic methane oxidation coupled to denitrification is the dominant methane sink in a deep lake, *Proceedings of the National Academy of Sciences*, 111, 18273-18278, 10.1073/pnas.1411617111, 2014.
- Edgar, R. C.: UPARSE: highly accurate OTU sequences from microbial amplicon reads, *Nature methods*, 10, 996-998, 2013.
- 735 Einsiedl, F., Wunderlich, A., Sebiló, M., Coskun, Ö. K., Orsi, W. D., and Mayer, B.: Biogeochemical evidence of anaerobic methane oxidation and anaerobic ammonium oxidation in a stratified lake using stable isotopes, *Biogeosciences*, 17, 5149-5161, 2020.
- Eller, G., Känel, L., and Krüger, M.: Cooccurrence of aerobic and anaerobic methane oxidation in the water column of Lake Plußsee, *Appl Environ Microb*, 71, 8925-8928, 2005.
- 740 EPA: Technical Guidance for the Natural Attenuation Indicators: Methane, Ethane, and Ethene, 2001.
- Ettwig, K. F., Butler, M. K., Le Paslier, D., Pelletier, E., Mangenot, S., Kuypers, M. M., Schreiber, F., Dutilh, B. E., Zedelius, J., and de Beer, D.: Nitrite-driven anaerobic methane oxidation by oxygenic bacteria, *Nature*, 464, 543-548, 2010.
- European Commission and United States of America: Global Methane Pledge, Climate and Clean Air Coalition, 2, 2021.
- Ferry, J. G.: How to make a living by exhaling methane, *Annual review of microbiology*, 64, 453-473, 2010.
- 745 Findlay, S.: Importance of surface-subsurface exchange in stream ecosystems: The hyporheic zone, *Limnol Oceanogr*, 40, 159-164, 1995.
- Fischer, H., Kloep, F., Wilzcek, S., and Pusch, M. T.: A river's liver—microbial processes within the hyporheic zone of a large lowland river, *Biogeochemistry*, 76, 349-371, 2005.
- 750 Graf, J. S., Mayr, M. J., Marchant, H. K., Tienken, D., Hach, P. F., Brand, A., Schubert, C. J., Kuypers, M. M., and Milucka, J.: Bloom of a denitrifying methanotroph, ‘*Candidatus Methyloirabilis limnetica*’, in a deep stratified lake, *Environ Microbiol*, 20, 2598-2614, 2018.
- Haroon, M. F., Hu, S., Shi, Y., Imelfort, M., Keller, J., Hugenholtz, P., Yuan, Z., and Tyson, G. W.: Anaerobic oxidation of methane coupled to nitrate reduction in a novel archaeal lineage, *Nature*, 500, 567-570, 10.1038/nature12375, 2013.



- 755 He, Z., Cai, C., Wang, J., Xu, X., Zheng, P., Jetten, M. S., and Hu, B.: A novel denitrifying methanotroph of the NC10 phylum and its microcolony, *Sci Rep-Uk*, 6, 1-10, 2016.
- Hesslein, R. H.: An in situ sampler for close interval pore water studies 1, *Limnol Oceanogr*, 21, 912-914, 1976.
- Hu, B.-l., Shen, L.-d., Lian, X., Zhu, Q., Liu, S., Huang, Q., He, Z.-f., Geng, S., Cheng, D.-q., Lou, L.-p., Xu, X.-y., Zheng, P., and He, Y.-f.: Evidence for nitrite-dependent anaerobic methane oxidation as a previously overlooked microbial methane sink in wetlands, *Proceedings of the National Academy of Sciences*, 111, 4495-4500, 10.1073/pnas.1318393111, 2014.
- 760 IPCC: The physical science basis, Cambridge, United Kingdom and New York, NY, USA, 2013.
- Iversen, N. and Jørgensen, B. B.: Diffusion coefficients of sulfate and methane in marine sediments: Influence of porosity, *Geochimica et Cosmochimica Acta*, 57, 571-578, 1993.
- 765 Jochum, L. M., Chen, X., Lever, M. A., Loy, A., Jørgensen, B. B., Schramm, A., and Kjeldsen, K. U.: Depth distribution and assembly of sulfate-reducing microbial communities in marine sediments of Aarhus Bay, *Appl Environ Microb*, 83, e01547-01517, 2017.
- Jørgensen, B. B., Weber, A., and Zopfi, J.: Sulfate reduction and anaerobic methane oxidation in Black Sea sediments, *Deep Sea Research Part I: Oceanographic Research Papers*, 48, 2097-2120, 2001.
- 770 Kampbell, D. H. and Vandegrift, S. A.: Analysis of dissolved methane, ethane, and ethylene in ground water by a standard gas chromatographic technique, *Journal of Chromatographic Science*, 36, 253-256, 1998.
- Kestin, J., Sokolov, M., and Wakeham, W. A.: Viscosity of liquid water in the range– 8 C to 150 C, *Journal of Physical and Chemical Reference Data*, 7, 941-948, 1978.
- Kirschke, S., Bousquet, P., Ciais, P., Saunois, M., Canadell, J. G., Dlugokencky, E. J., Bergamaschi, P., Bergmann, D., Blake, D. R., and Bruhwiler, L.: Three decades of global methane sources and sinks, *Nature geoscience*, 6, 813-823, 2013.
- 775 Kits, K. D., Klotz, M. G., and Stein, L. Y.: Methane oxidation coupled to nitrate reduction under hypoxia by the *Gammmaproteobacterium* *Methylomonas denitrificans*, sp. nov. type strain FJG1, *Environ Microbiol*, 17, 3219-3232, 2015.
- Komura, S. and Colby, B. R.: Sediment Transportation Mechanics: Introduction and Properties of Sediment, *Journal of the Hydraulics Division*, 89, 263-268, 1963.
- 780 Krzycki, J., Kenealy, W., DeNiro, M., and Zeikus, J.: Stable carbon isotope fractionation by *Methanosarcina barkeri* during methanogenesis from acetate, methanol, or carbon dioxide-hydrogen, *Appl Environ Microb*, 53, 2597-2599, 1987.
- Ladd, J. and Jackson, R.: Biochemistry of ammonification, *Nitrogen in agricultural soils*, 22, 173-228, 1982.
- Luesken, F. A., Wu, M. L., Op den Camp, H. J., Keltjens, J. T., Stunnenberg, H., Francoijs, K. J., Strous, M., and Jetten, M. S.: Effect of oxygen on the anaerobic methanotroph ‘*Candidatus Methylomirabilis oxyfera*’: kinetic and transcriptional analysis, *Environ Microbiol*, 14, 1024-1034, 2012.
- 785 Mach, V., Blaser, M. B., Claus, P., Chaudhary, P. P., and Rulik, M.: Methane production potentials, pathways, and communities of methanogens in vertical sediment profiles of river Sitka, *Front Microbiol*, 6, 506, 2015.



- Marzadri, A., Tonina, D., and Bellin, A.: Morphodynamic controls on redox conditions and on nitrogen dynamics within the hyporheic zone: Application to gravel bed rivers with alternate-bar morphology, *Journal of Geophysical Research: Biogeosciences*, 117, 2012.
- 790 Naqvi, S. W. A., Lam, P., Narvenkar, G., Sarkar, A., Naik, H., Pratihary, A., Shenoy, D. M., Gauns, M., Kurian, S., and Damare, S.: Methane stimulates massive nitrogen loss from freshwater reservoirs in India, *Nat Commun*, 9, 1-10, 2018.
- Narrowe, A. B., Borton, M. A., Hoyt, D. W., Smith, G. J., Daly, R. A., Angle, J. C., Eder, E. K., Wong, A. R., Wolfe, R. A., and Pappas, A.: Uncovering the diversity and activity of methylotrophic methanogens in freshwater wetland soils, *Msystems*, 4, e00320-00319, 2019.
- 795 Nazaries, L., Murrell, J. C., Millard, P., Baggs, L., and Singh, B. K.: Methane, microbes and models: fundamental understanding of the soil methane cycle for future predictions, *Environ Microbiol*, 15, 2395-2417, 2013.
- Ng, G. H. C., Rosenfeld, C. E., Santelli, C. M., Yourd, A. R., Lange, J., Duhn, K., and Johnson, N. W.: Microbial and reactive transport modeling evidence for hyporheic flux-driven cryptic sulfur cycling and anaerobic methane oxidation in a sulfate-impacted wetland-stream system, *Journal of Geophysical Research: Biogeosciences*, 125, e2019JG005185, 2020.
- 800 Nisbet, E. G., Dlugokencky, E. J., and Bousquet, P.: Methane on the rise—again, *Science*, 343, 493-495, 2014.
- Nisbet, E. G., Manning, M., Dlugokencky, E., Fisher, R., Lowry, D., Michel, S., Myhre, C. L., Platt, S. M., Allen, G., and Bousquet, P.: Very strong atmospheric methane growth in the 4 years 2014–2017: Implications for the Paris Agreement, *Global Biogeochemical Cycles*, 33, 318-342, 2019.
- Norði, K. á. and Thamdrup, B.: Nitrate-dependent anaerobic methane oxidation in a freshwater sediment, *Geochimica et Cosmochimica Acta*, 132, 141-150, 2014.
- 805 Norði, K. á., Thamdrup, B., and Schubert, C. J.: Anaerobic oxidation of methane in an iron-rich Danish freshwater lake sediment, *Limnol Oceanogr*, 58, 546-554, 2013.
- Offre, P., Spang, A., and Schleper, C.: Archaea in biogeochemical cycles, *Annual Review of Microbiology*, 67, 437-457, 2013.
- Op den Camp, H. J., Islam, T., Stott, M. B., Harhangi, H. R., Hynes, A., Schouten, S., Jetten, M. S., Birkeland, N. K., Pol, A., and Dunfield, P. F.: Environmental, genomic and taxonomic perspectives on methanotrophic Verrucomicrobia, *Environmental Microbiology Reports*, 1, 293-306, 2009.
- 810 Oswald, K., Graf, J. S., Littmann, S., Tienken, D., Brand, A., Wehrli, B., Albertsen, M., Daims, H., Wagner, M., and Kuypers, M. M.: Crenothrix are major methane consumers in stratified lakes, *The ISME journal*, 11, 2124-2140, 2017.
- Peña Sanchez, A., Mayer, B., Wunderlich, A., Rein, A., and Einsiedl, F.: Analysing seasonal variations of methane oxidation processes coupled with denitrification in a stratified lake using stable isotopes and numerical modeling, *Geochimica et Cosmochimica Acta*, 2022.
- 815 Pichler, M., Coskun, Ö. K., Ortega-Arbulú, A. S., Conci, N., Wörheide, G., Vargas, S., and Orsi, W. D.: A 16S rRNA gene sequencing and analysis protocol for the Illumina MiniSeq platform, *Microbiologyopen*, 7, e00611, 2018.
- 820 Pulg, U., Barlaup, B. T., Sternecker, K., Trepl, L., and Unfer, G.: Restoration of spawning habitats of brown trout (*Salmo trutta*) in a regulated chalk stream, *River Research and Applications*, 29, 172-182, 2013.



- Quast, C., Pruesse, E., Yilmaz, P., Gerken, J., Schweer, T., Yarza, P., Peplies, J., and Glöckner, F. O.: The SILVA ribosomal RNA gene database project: improved data processing and web-based tools, *Nucleic acids research*, 41, D590-D596, 2012.
- Raghoebarsing, A. A., Pol, A., van de Pas-Schoonen, K. T., Smolders, A. J. P., Ettwig, K. F., Rijpstra, W. I. C., Schouten, S., Damsté, J. S. S., Op den Camp, H. J. M., Jetten, M. S. M., and Strous, M.: A microbial consortium couples anaerobic methane oxidation to denitrification, *Nature*, 440, 918-921, 10.1038/nature04617, 2006.
- 825
- Reeburgh, W. S.: Methane consumption in Cariaco Trench waters and sediments, *Earth Planet Sc Lett*, 28, 337-344, 1976.
- Romeijn, P., Comer-Warner, S. A., Ullah, S., Hannah, D. M., and Krause, S.: Streambed organic matter controls on carbon dioxide and methane emissions from streams, *Environ Sci Technol*, 53, 2364-2374, 2019.
- Rosas, J., Lopez, O., Missimer, T. M., Coulibaly, K. M., Dehwah, A. H., Sesler, K., Lujan, L. R., and Mantilla, D.: Determination of hydraulic conductivity from grain-size distribution for different depositional environments, *Groundwater*, 52, 399-413, 2014.
- 830
- Rutherford, J., Latimer, G., and Smith, R.: Bedform mobility and benthic oxygen uptake, *Water Res*, 27, 1545-1558, 1993.
- Rutherford, J., Boyle, J., Elliott, A., Hatherell, T., and Chiu, T.: Modeling benthic oxygen uptake by pumping, *Journal of Environmental Engineering*, 121, 84-95, 1995.
- 835
- Saunio, M., Stavert, A. R., Poulter, B., Bousquet, P., Canadell, J. G., Jackson, R. B., Raymond, P. A., Dlugokencky, E. J., Houweling, S., and Patra, P. K.: The global methane budget 2000–2017, *Earth System Science Data*, 12, 1561-1623, 2020.
- Scheller, S., Ermler, U., and Shima, S.: Catabolic pathways and enzymes involved in anaerobic methane oxidation, *Anaerobic Utilization of Hydrocarbons, Oils, and Lipids*, 31-59, 2020.
- Schubert, C. J., Vazquez, F., Lösekann-Behrens, T., Knittel, K., Tonolla, M., and Boetius, A.: Evidence for anaerobic oxidation of methane in sediments of a freshwater system (Lago di Cadagno), *FEMS microbiology ecology*, 76, 26-38, 2011.
- 840
- Segarra, K., Schubotz, F., Samarkin, V., Yoshinaga, M., Hinrichs, K., and Joye, S.: High rates of anaerobic methane oxidation in freshwater wetlands reduce potential atmospheric methane emissions, *Nat Commun*, 6, 1-8, 2015.
- Shelley, F., Abdullahi, F., Grey, J., and Trimmer, M.: Microbial methane cycling in the bed of a chalk river: oxidation has the potential to match methanogenesis enhanced by warming, *Freshwater Biology*, 60, 150-160, 2015.
- 845
- Shelley, F., Ings, N., Hildrew, A. G., Trimmer, M., and Grey, J.: Bringing methanotrophy in rivers out of the shadows, *Limnol Oceanogr*, 62, 2345-2359, 2017.
- Shen, L.-d., Ouyang, L., Zhu, Y., and Trimmer, M.: Active pathways of anaerobic methane oxidation across contrasting riverbeds, *The ISME journal*, 13, 752-766, 2019.
- Shen, L.-d., Wu, H.-s., Liu, X., and Li, J.: Cooccurrence and potential role of nitrite- and nitrate-dependent methanotrophs in freshwater marsh sediments, *Water Res*, 123, 162-172, 2017.
- 850
- Silvennoinen, H., Liikanen, A., Rintala, J., and Martikainen, P. J.: Greenhouse gas fluxes from the eutrophic Temmesjoki River and its Estuary in the Liminganlahti Bay (the Baltic Sea), *Biogeochemistry*, 90, 193-208, 2008.
- Spoelstra, J., Leal, K. A., Senger, N. D., Schiff, S. L., and Post, R.: Isotopic characterization of sulfate in a shallow aquifer impacted by agricultural fertilizer, *Groundwater*, 59, 658-670, 2021.



- 855 Spratt Jr, H. G., Morgan, M. D., and Good, R. E.: Sulfate reduction in peat from a New Jersey pinelands cedar swamp, *Appl Environ Microb*, 53, 1406-1411, 1987.
- Stanley, E. H., Casson, N. J., Christel, S. T., Crawford, J. T., Loken, L. C., and Oliver, S. K.: The ecology of methane in streams and rivers: patterns, controls, and global significance, *Ecological Monographs*, 86, 146-171, 10.1890/15-1027, 2016.
- 860 Storey, R., Fulthorpe, R. R., and Williams, D. D.: Perspectives and predictions on the microbial ecology of the hyporheic zone, *Freshwater Biology*, 41, 119-130, 1999.
- Takeuchi, M., Ozaki, H., Hiraoka, S., Kamagata, Y., Sakata, S., Yoshioka, H., and Iwasaki, W.: Possible cross-feeding pathway of facultative methylotroph *Methyloceanibacter caenitepidi* Gela4 on methanotroph *Methylocaldum marinum* S8, *PloS one*, 14, e0213535, 2019.
- 865 Teasdale, P. R., Batley, G. E., Apte, S. C., and Webster, I. T.: Pore water sampling with sediment peepers, *TrAC Trends in Analytical Chemistry*, 14, 250-256, 1995.
- Timmers, P. H., Suarez-Zuluaga, D. A., van Rossem, M., Diender, M., Stams, A. J., and Plugge, C. M.: Anaerobic oxidation of methane associated with sulfate reduction in a natural freshwater gas source, *The ISME journal*, 10, 1400-1412, 2016.
- Trimmer, M., Grey, J., Heppell, C. M., Hildrew, A. G., Lansdown, K., Stahl, H., and Yvon-Durocher, G.: River bed carbon and nitrogen cycling: state of play and some new directions, *Sci Total Environ*, 434, 143-158, 2012.
- 870 Triska, F. J., Duff, J. H., and Avanzino, R. J.: The role of water exchange between a stream channel and its hyporheic zone in nitrogen cycling at the terrestrial—aquatic interface, in: *Nutrient dynamics and retention in land/water ecotones of lowland, temperate lakes and rivers*, Springer, 167-184, 1993.
- 875 Vaksmaa, A., van Alen, T. A., Ettwig, K. F., Lupotto, E., Valè, G., Jetten, M. S., and Lüke, C.: Stratification of diversity and activity of methanogenic and methanotrophic microorganisms in a nitrogen-fertilized Italian paddy soil, *Front Microbiol*, 8, 2127, 2017.
- van Grinsven, S., Sinninghe Damsté, J. S., Abdala Asbun, A., Engelmann, J. C., Harrison, J., and Villanueva, L.: Methane oxidation in anoxic lake water stimulated by nitrate and sulfate addition, *Environ Microbiol*, 22, 766-782, 2020.
- Vanwonterghem, I., Evans, P. N., Parks, D. H., Jensen, P. D., Woodcroft, B. J., Hugenholtz, P., and Tyson, G. W.: Methylotrophic methanogenesis discovered in the archaeal phylum *Verstraetearchaeota*, *Nature microbiology*, 1, 1-9, 2016.
- 880 Vermaat, J. E., Harmsen, J., Hellmann, F. A., van der Geest, H. G., de Klein, J. J., Kosten, S., Smolders, A. J., Verhoeven, J. T., Mes, R. G., and Ouboter, M.: Annual sulfate budgets for Dutch lowland peat polders: The soil is a major sulfate source through peat and pyrite oxidation, *Journal of Hydrology*, 533, 515-522, 2016.
- 885 Versantvoort, W., Guerrero-Cruz, S., Speth, D. R., Frank, J., Gambelli, L., Cremers, G., van Alen, T., Jetten, M. S., Kartal, B., and Op den Camp, H. J.: Comparative genomics of *Candidatus Methyloirabilis* species and description of *Ca. Methyloirabilis lanthanidiphila*, *Front Microbiol*, 9, 1672, 2018.
- Villa, J. A., Smith, G. J., Ju, Y., Renteria, L., Angle, J. C., Arntzen, E., Harding, S. F., Ren, H., Chen, X., and Sawyer, A. H.: Methane and nitrous oxide porewater concentrations and surface fluxes of a regulated river, *Sci Total Environ*, 715, 136920, 2020.



- 890 Vuillemin, A., Wankel, S. D., Coskun, Ö. K., Magritsch, T., Vargas, S., Estes, E. R., Spivack, A. J., Smith, D. C., Pockalny, R., and Murray, R. W.: Archaea dominate oxic subseafloor communities over multimillion-year time scales, *Science Advances*, 5, eaaw4108, 2019.
- Whiticar, M. J.: Carbon and hydrogen isotope systematics of bacterial formation and oxidation of methane, *Chemical Geology*, 161, 291-314, 1999.
- 895 Whiticar, M. J., Faber, E., and Schoell, M.: Biogenic methane formation in marine and freshwater environments: CO<sub>2</sub> reduction vs. acetate fermentation—isotope evidence, *Geochimica et Cosmochimica Acta*, 50, 693-709, 1986.
- Winter, T. C., Harvey, J. W., Franke, L. O., and Alley, W. M.: Ground water and surface water: A single resource, U.S. Geological Survey, Denver, Colorado, 1998.
- Wu, G., Zhang, T., Gu, M., Chen, Z., and Yin, Q.: Review of characteristics of anammox bacteria and strategies for anammox start-up for sustainable wastewater resource management, *Water Sci Technol*, 82, 1742-1757, 2020.
- 900 Wu, W. and Wang, S. S.: Formulas for sediment porosity and settling velocity, *Journal of Hydraulic Engineering*, 132, 858-862, 2006.
- Zehlius-Eckert, W., Schwaiger, H., and Beckmann, A.: Monitoring und Erfolgskontrolle im Freisinger Moos,
- Zhang, M., Luo, Y., Lin, X., Hetharua, B., Zhao, W., Zhou, M., Zhan, Q., Xu, H., Zheng, T., and Tian, Y.: Molecular and stable isotopic evidence for the occurrence of nitrite-dependent anaerobic methane-oxidizing bacteria in the mangrove sediment of Zhangjiang Estuary, China, *Applied microbiology and biotechnology*, 102, 2441-2454, 2018.
- 905 Zhu, G., Zhou, L., Wang, Y., Wang, S., Guo, J., Long, X. E., Sun, X., Jiang, B., Hou, Q., and Jetten, M. S.: Biogeographical distribution of denitrifying anaerobic methane oxidizing bacteria in Chinese wetland ecosystems, *Environmental microbiology reports*, 7, 128-138, 2015.
